# Supplementary material for: Advancing rhodium nanoparticle-based photodynamic cancer therapy: quantitative proteomics and in vivo assessment reveal mechanisms targeting tumor metabolism, progression and drug resistance
Source: Royal Society of Chemistry journal article supplement (doi:10.1039/d4tb01631a), 2024-01-01
Supplement: d4tb01631a1.pdf [file d4tb01631a1.pdf]

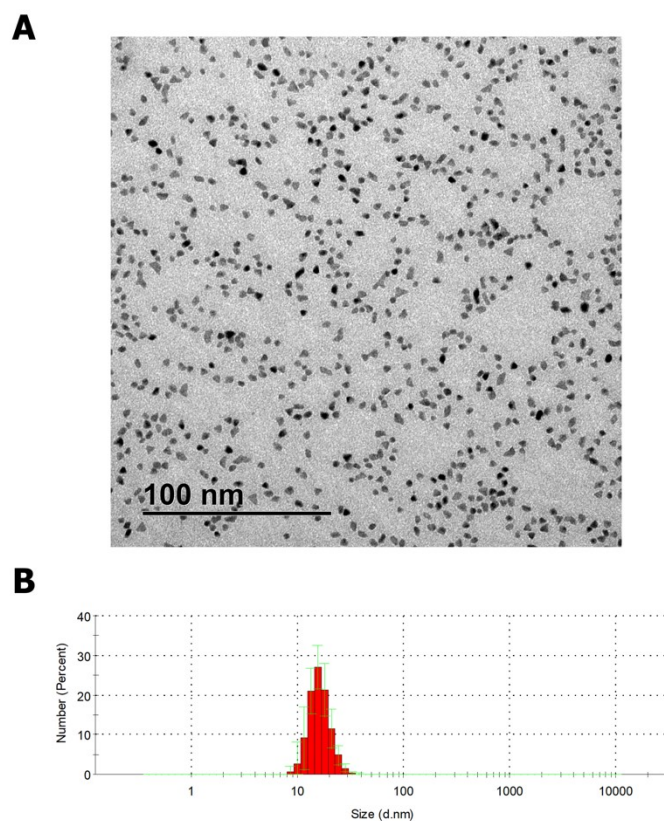

**Supplemental Figure S1.** Transmission electron microscopy micrograph of RhNPs

(A). Hydrodynamic size distribution obtained by dynamic light scattering (DLS) measurements (B).

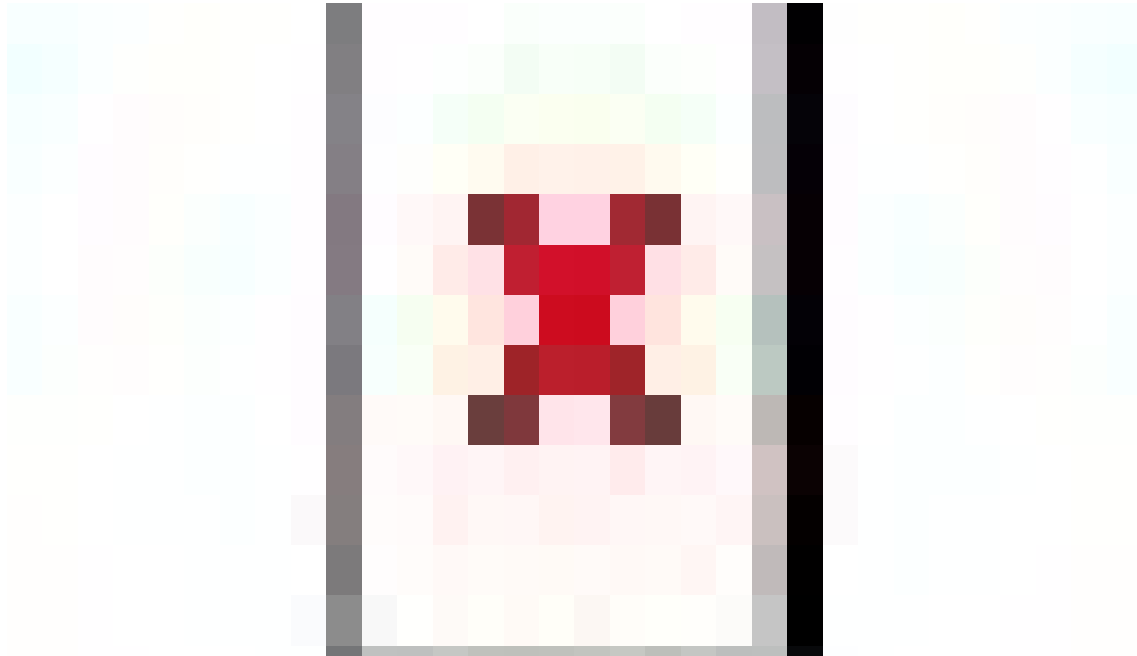

**Supplemental Figure S2.** Volcano plot of the proteins quantified by the SILAC approach. Each dot represents a single protein, and colored areas represent the statistically significant thresholds.
