# Supplementary material for: Advancing rhodium nanoparticle-based photodynamic cancer therapy: quantitative proteomics and in vivo assessment reveal mechanisms targeting tumor metabolism, progression and drug resistance
Source: Royal Society of Chemistry journal article supplement (doi:10.1039/d4tb01631a), 2024-01-01
Supplement: d4tb01631a2.pdf [file d4tb01631a2.pdf]

**Supplemental Table S1.** List of total identified protein by SILAC approach.

| Common name | Accession  | Protein name                                                           | Mascot Score |
|-------------|------------|------------------------------------------------------------------------|--------------|
| MRPS22      | P82650     | 28S ribosomal protein S22, mitochondrial                               | 38           |
| TFCP2       | Q12800     | Alpha-globin transcription factor CP2                                  | 18           |
| KIF1Bbeta   | Q4R9M9     | Kinesin family member 1Bbeta isoform II                                | 31           |
| QARS        | A0A1B0GVU9 | Glutamine--tRNA ligase (Fragment)                                      | 191          |
| PPP4R1      | J3KSB0     | Serine/threonine-protein phosphatase 4 regulatory subunit 1 (Fragment) | 28           |
| CLASP1      | Q7Z460     | CLIP-associating protein 1                                             | 13           |
| SLC25A1     | P53007     | Tricarboxylate transport protein, mitochondrial                        | 27           |
| POLE3       | Q9NRF9     | DNA polymerase epsilon subunit 3                                       | 22           |
| LUZP1       | Q86V48     | Leucine zipper protein 1                                               | 52           |
| COMMD9      | E9PJ95     | COMM domain-containing protein 9                                       | 0            |
| -           | C9JAW5     | Uncharacterized protein                                                | 13           |
| NDUFS1      | P28331     | NADH-ubiquinone oxidoreductase 75 kDa subunit, mitochondrial           | 60           |
| DARS2       | Q6PI48     | Aspartate--tRNA ligase, mitochondrial                                  | 0            |
| PAPSS1      | O43252     | Bifunctional 3'-phosphoadenosine 5'-phosphosulfate synthase 1          | 19           |
| KNOP1       | Q1ED39     | Lysine-rich nucleolar protein 1                                        | 16           |
| ATG3        | Q9NT62     | Ubiquitin-like-conjugating enzyme ATG3                                 | 51           |
| CSTB        | P04080     | Cystatin-B                                                             | 26           |
| CNOT10      | H7C1X9     | CCR4-NOT transcription complex subunit 10 (Fragment)                   | 16           |
| HSF1        | E9PMQ6     | Heat shock factor protein 1                                            | 32           |
| PGM2        | Q96G03     | Phosphoglucomutase-2                                                   | 45           |
| AARSD1      | Q9BTE6     | Alanyl-tRNA editing protein Aarsd1                                     | 17           |
| DHX29       | A0A087WYN9 | ATP-dependent RNA helicase DHX29                                       | 0            |
| BAX         | Q07812     | Apoptosis regulator BAX                                                | 18           |
| ASL         | P04424     | Argininosuccinate lyase                                                | 13           |
| MRPS9       | P82933     | 28S ribosomal protein S9, mitochondrial                                | 40           |
| FTO         | A0A1B0GVH5 | Alpha-ketoglutarate-dependent dioxygenase FTO                          | 16           |
| SRA1        | Q9HD15     | Steroid receptor RNA activator 1                                       | 39           |
| RPL14       | P50914     | 60S ribosomal protein L14                                              | 198          |
| PCBP2       | F8VZX2     | Poly(rC)-binding protein 2                                             | 462          |
| MAP7D1      | Q3KQU3     | MAP7 domain-containing protein 1                                       | 50           |
| GNG12       | Q9UBI6     | Guanine nucleotide-binding protein G(I)/G(S)/G(O) subunit gamma-12     | 113          |
| IFRD2       | Q12894     | Interferon-related developmental regulator 2                           | 0            |
| HYPK        | J3QT56     | Huntingtin-interacting protein K                                       | 16           |
| SNRNP200    | O75643     | U5 small nuclear ribonucleoprotein 200 kDa helicase                    | 42           |
| ADRM1       | A0A087WX59 | Proteasomal ubiquitin receptor ADRM1                                   | 20           |
| HCFC1       | P51610     | Host cell factor 1                                                     | 99           |
| SMC2        | O95347     | Structural maintenance of chromosomes protein 2                        | 35           |
| KYNU        | Q16719     | Kynureninase                                                           | 43           |
| VTN         | P04004     | Vitronectin                                                            | 135          |
| SQSTM1      | Q13501     | Sequestosome-1                                                         | 202          |
| CLUH        | K7EIG1     | Clustered mitochondria protein homolog (Fragment)                      | 46           |
| PDS5A       | Q29RF7     | Sister chromatid cohesion protein PDS5 homolog A                       | 20           |

|          |            |                                                                      |     |
|----------|------------|----------------------------------------------------------------------|-----|
| HMOX1    | P09601     | Heme oxygenase 1                                                     | 95  |
| UGDH     | O60701     | UDP-glucose 6-dehydrogenase                                          | 641 |
| MVP      | Q14764     | Major vault protein                                                  | 37  |
| ARHGAP18 | Q8N392     | Rho GTPase-activating protein 18                                     | 35  |
| SPDL1    | Q96EA4     | Protein Spindly                                                      | 22  |
| SLC16A3  | O15427     | Monocarboxylate transporter 4                                        | 112 |
| NDUFAF2  | Q8N183     | NADH dehydrogenase [ubiquinone] 1 alpha subcomplex assembly factor 2 | 91  |
| NPLOC4   | Q8TAT6     | Nuclear protein localization protein 4 homolog                       | 95  |
| RBM34    | Q5TCT4     | RNA-binding protein 34 (Fragment)                                    | 30  |
| TXNRD2   | A0A182DWF2 | Thioredoxin reductase 2, mitochondrial                               | 16  |
| SLC9A3R2 | Q15599-3   | Isoform 3 of Na(+)/H(+) exchange regulatory cofactor NHE-RF2         | 23  |
| EPB41L2  | E9PK52     | Band 4.1-like protein 2                                              | 19  |
| ALDH3A1  | I3L3I9     | Aldehyde dehydrogenase, dimeric NADP-preferring                      | 24  |
| NAF1     | Q96HR8     | H/ACA ribonucleoprotein complex non-core subunit NAF1                | 47  |
| TNPO3    | Q9Y5L0-1   | Isoform 1 of Transportin-3                                           | 39  |
| STRIP2   | Q9ULQ0     | Striatin-interacting protein 2                                       | 26  |
| AFP      | J3KMX3     | Alpha-fetoprotein                                                    | 48  |
| LEMD3    | Q9Y2U8     | Inner nuclear membrane protein Man1                                  | 17  |
| NOMO2    | Q5JPE7     | Nodal modulator 2                                                    | 25  |
| METTL1   | H0YHU4     | tRNA (guanine-N(7)-)-methyltransferase (Fragment)                    | 27  |
| PDHX     | O00330     | Pyruvate dehydrogenase protein X component, mitochondrial            | 21  |
| IDE      | P14735     | Insulin-degrading enzyme                                             | 14  |
| ECHDC1   | Q9NTX5     | Ethylmalonyl-CoA decarboxylase                                       | 26  |
| CD55     | H7BY55     | Complement decay-accelerating factor                                 | 48  |
| VAMP3    | Q15836     | Vesicle-associated membrane protein 3                                | 110 |
| LRRFIP2  | Q9Y608     | Leucine-rich repeat flightless-interacting protein 2                 | 15  |
| SPATA5   | Q8NB90     | Spermatogenesis-associated protein 5                                 | 26  |
| HS3ST3A1 | Q9Y663     | Heparan sulfate glucosamine 3-O-sulfotransferase 3A1                 | 0   |
| SMN2     | B4DP61     | Survival motor neuron protein                                        | 25  |
| UBE2G1   | P62253     | Ubiquitin-conjugating enzyme E2 G1                                   | 95  |
| RPS10    | P46783     | 40S ribosomal protein S10                                            | 528 |
| PRPF3    | O43395     | U4/U6 small nuclear ribonucleoprotein Prp3                           | 46  |
| ALDH3A2  | P51648     | Fatty aldehyde dehydrogenase                                         | 138 |
| -        | F8W031     | Uncharacterized protein (Fragment)                                   | 319 |
| REXO2    | H0YGR4     | Oligoribonuclease, mitochondrial (Fragment)                          | 25  |
| ATL2     | C9JQQ5     | Atlastin-2 (Fragment)                                                | 0   |
| ZC3H7B   | Q9UGR2     | Zinc finger CCCH domain-containing protein 7B                        | 20  |
| HARS2    | P49590     | Probable histidine--tRNA ligase, mitochondrial                       | 145 |
| LSM8     | C9JNV3     | U6 snRNA-associated Sm-like protein LSM8 (Fragment)                  | 17  |
| PPA2     | Q9H2U2     | Inorganic pyrophosphatase 2, mitochondrial                           | 42  |
| TGOLN2   | O43493     | Trans-Golgi network integral membrane protein 2                      | 26  |
| CD44     | H0YD13     | CD44 antigen                                                         | 721 |
| RPL18A   | M0R3D6     | 60S ribosomal protein L18a (Fragment)                                | 238 |
| RFC5     | P40937     | Replication factor C subunit 5                                       | 40  |
| VPS4B    | O75351     | Vacuolar protein sorting-associated protein 4B                       | 61  |
| RBMS1    | F6Y5H0     | RNA-binding motif, single-stranded-interacting protein 1             | 120 |

|          |          |                                                                          |       |
|----------|----------|--------------------------------------------------------------------------|-------|
| ACTL6A   | O96019   | Actin-like protein 6A                                                    | 61    |
| EIF1AX   | P47813   | Eukaryotic translation initiation factor 1A, X-chromosomal               | 33    |
| PAF1     | Q8N7H5   | RNA polymerase II-associated factor 1 homolog                            | 47    |
| TBL2     | Q9Y4P3   | Transducin beta-like protein 2                                           | 110   |
| POLD1    | M0R2B7   | DNA polymerase                                                           | 21    |
| ABCF3    | Q9NUQ8   | ATP-binding cassette sub-family F member 3                               | 38    |
| FANCI    | Q9NVI1   | Fanconi anemia group I protein                                           | 15    |
| FLOT2    | K7EKW9   | Flotillin-2 (Fragment)                                                   | 0     |
| DDX54    | Q8TDD1   | ATP-dependent RNA helicase DDX54                                         | 99    |
| ACSL4    | O60488   | Long-chain-fatty-acid--CoA ligase 4                                      | 75    |
| GATAD2B  | Q8WXI9   | Transcriptional repressor p66-beta                                       | 21    |
| CKAP2    | C9J7Y4   | Cytoskeleton-associated protein 2 (Fragment)                             | 61    |
| VIM      | P08670   | Vimentin                                                                 | 10244 |
| VKORC1L1 | Q8N0U8   | Vitamin K epoxide reductase complex subunit 1-like protein<br>1          | 20    |
| CDKN2A   | P42771   | Cyclin-dependent kinase inhibitor 2A                                     | 395   |
| RRP12    | Q5JTH9   | RRP12-like protein                                                       | 36    |
| ITGA5    | P08648   | Integrin alpha-5                                                         | 40    |
| CALU     | O43852   | Calumenin                                                                | 287   |
| DNAJC11  | B1AK20   | DnaJ homolog subfamily C member 11 (Fragment)                            | 52    |
| NDUFA12  | F8VXI1   | NADH dehydrogenase [ubiquinone] 1 alpha subcomplex<br>subunit 12         | 62    |
| CLINT1   | Q14677   | Clathrin interactor 1                                                    | 17    |
| TXNRD1   | Q16881   | Thioredoxin reductase 1, cytoplasmic                                     | 1888  |
| GNPDA1   | P46926   | Glucosamine-6-phosphate isomerase 1                                      | 45    |
| MRPL38   | Q96DV4   | 39S ribosomal protein L38, mitochondrial                                 | 64    |
| HNRNPD   | Q14103-2 | Isoform 2 of Heterogeneous nuclear ribonucleoprotein D0                  | 923   |
| METAP2   | P50579   | Methionine aminopeptidase 2                                              | 112   |
| SRP68    | Q9UHB9   | Signal recognition particle subunit SRP68                                | 178   |
| TMEM33   | D6RAA6   | Transmembrane protein 33 (Fragment)                                      | 49    |
| HLA-B    | P30479   | HLA class I histocompatibility antigen, B-41 alpha chain                 | 170   |
| TRIM16   | O95361   | Tripartite motif-containing protein 16                                   | 52    |
| WBP11    | Q9Y2W2   | WW domain-binding protein 11                                             | 20    |
| HK1      | P19367   | Hexokinase-1                                                             | 50    |
| AIMP2    | Q13155   | Aminoacyl tRNA synthase complex-interacting<br>multifunctional protein 2 | 40    |
| FUS      | P35637   | RNA-binding protein FUS                                                  | 240   |
| DDX39A   | O00148   | ATP-dependent RNA helicase DDX39A                                        | 381   |
| RAVER1   | K7EKR9   | Ribonucleoprotein PTB-binding 1 (Fragment)                               | 94    |
| SHTN1    | A0MZ66   | Shootin-1                                                                | 15    |
| CRK      | P46108   | Adapter molecule crk                                                     | 137   |
| PSMD3    | O43242   | 26S proteasome non-ATPase regulatory subunit 3                           | 162   |
| PELP1    | Q8IZL8   | Proline-, glutamic acid- and leucine-rich protein 1                      | 15    |
| TMCO1    | J9JIE6   | Calcium load-activated calcium channel                                   | 126   |
| ZC3H15   | Q8WU90   | Zinc finger CCCH domain-containing protein 15                            | 34    |
| EIF3M    | Q7L2H7   | Eukaryotic translation initiation factor 3 subunit M                     | 493   |
| AKR1C2   | P52895   | Aldo-keto reductase family 1 member C2                                   | 907   |
| PSPH     | C9JBI3   | Phosphoserine phosphatase (Fragment)                                     | 0     |
| UTP18    | Q9Y5J1   | U3 small nucleolar RNA-associated protein 18 homolog                     | 93    |

|              |            |                                                                                  |      |
|--------------|------------|----------------------------------------------------------------------------------|------|
| PCK2         | B4DW73     | Phosphoenolpyruvate carboxykinase [GTP], mitochondrial                           | 22   |
| NAT10        | Q9H0A0     | RNA cytidine acetyltransferase                                                   | 16   |
| SLC29A1      | Q99808     | Equilibrative nucleoside transporter 1                                           | 25   |
| YES1         | J3QRU1     | Tyrosine-protein kinase                                                          | 0    |
| RTN4         | Q9NQC3     | Reticulon-4                                                                      | 305  |
| UBXN4        | Q92575     | UBX domain-containing protein 4                                                  | 0    |
| TOMM40       | O96008     | Mitochondrial import receptor subunit TOM40 homolog                              | 52   |
| NUSAP1       | Q9BXS6     | Nucleolar and spindle-associated protein 1                                       | 44   |
| OGT          | O15294     | UDP-N-acetylglucosamine--peptide N-acetylglucosaminyltransferase 110 kDa subunit | 106  |
| ATP6V1G2     | O95670     | V-type proton ATPase subunit G 2                                                 | 28   |
| JAGN1        | Q8N5M9     | Protein jagunal homolog 1                                                        | 48   |
| TRMT1        | Q9NXH9     | tRNA (guanine(26)-N(2))-dimethyltransferase                                      | 63   |
| ARPC5L       | Q9BPX5     | Actin-related protein 2/3 complex subunit 5-like protein                         | 90   |
| EEF1B2       | P24534     | Elongation factor 1-beta                                                         | 992  |
| PITRM1       | A0A0A0MRX9 | Presequence protease, mitochondrial                                              | 52   |
| ATP5G1       | P05496     | ATP synthase F(0) complex subunit C1, mitochondrial                              | 182  |
| SYPL1        | C9JYN0     | Synaptophysin-like protein 1                                                     | 55   |
| GANAB        | Q14697-2   | Isoform 2 of Neutral alpha-glucosidase AB                                        | 1256 |
| PIGK         | Q92643     | GPI-anchor transamidase                                                          | 15   |
| ITGA3        | P26006     | Integrin alpha-3                                                                 | 39   |
| BID          | P55957     | BH3-interacting domain death agonist                                             | 56   |
| DRAP1        | E9PNC7     | Dr1-associated corepressor (Fragment)                                            | 0    |
| NUP107       | P57740     | Nuclear pore complex protein Nup107                                              | 33   |
| H2AFV        | Q71UI9     | Histone H2A.V                                                                    | 718  |
| GNL3         | Q9BVP2     | Guanine nucleotide-binding protein-like 3                                        | 76   |
| TMEM201      | Q5SNT2     | Transmembrane protein 201                                                        | 165  |
| KPNA3        | O00505     | Importin subunit alpha-4                                                         | 104  |
| WNK1         | F5GWT4     | Serine/threonine-protein kinase WNK1                                             | 26   |
| ASNS         | P08243     | Asparagine synthetase [glutamine-hydrolyzing]                                    | 266  |
| B2M          | H0YLF3     | Beta-2-microglobulin (Fragment)                                                  | 19   |
| SCFD1        | Q8WVM8     | Sec1 family domain-containing protein 1                                          | 43   |
| GPN1         | Q9HCN4     | GPN-loop GTPase 1                                                                | 157  |
| TMX2 PE=4    | E9PRL5     | Thioredoxin-related transmembrane protein 2                                      | 58   |
| EIF4E1B PE=3 | A6NMX2     | Eukaryotic translation initiation factor 4E type 1B                              | 61   |
| GCLC         | E1CEI4     | Glutamate--cysteine ligase catalytic subunit                                     | 86   |
| CD63         | F8VWK8     | Tetraspanin (Fragment)                                                           | 31   |
| SLC1A5       | Q15758     | Neutral amino acid transporter B(0)                                              | 413  |
| MAP2K3       | P46734     | Dual specificity mitogen-activated protein kinase kinase 3                       | 23   |
| TXNRD1       | F8W809     | Thioredoxin reductase 1, cytoplasmic                                             | 1891 |
| TFB2M        | Q9H5Q4     | Dimethyladenosine transferase 2, mitochondrial                                   | 59   |
| SCP2         | P22307     | Non-specific lipid-transfer protein                                              | 40   |
| TCOF1        | E7ETY2     | Treacle protein                                                                  | 116  |
| PRPSAP2      | E7EW35     | Phosphoribosyl pyrophosphate synthase-associated protein 2                       | 18   |
| ALDH2        | P05091     | Aldehyde dehydrogenase, mitochondrial                                            | 61   |
| PPAT         | Q06203     | Amidophosphoribosyltransferase                                                   | 0    |
| ERLIN1       | O75477     | Erlin-1                                                                          | 93   |
| RRP9         | O43818     | U3 small nucleolar RNA-interacting protein 2                                     | 26   |

|          |            |                                                             |      |
|----------|------------|-------------------------------------------------------------|------|
| TRIP12   | Q14669     | E3 ubiquitin-protein ligase TRIP12                          | 19   |
| YBX1     | P67809     | Nuclease-sensitive element-binding protein 1                | 1095 |
| ADAR     | P55265     | Double-stranded RNA-specific adenosine deaminase            | 63   |
| TXNL1    | O43396     | Thioredoxin-like protein 1                                  | 539  |
| MAGED2   | Q5H909     | Melanoma-associated antigen D2                              | 97   |
| AKR1C3   | A0A0A0MSS8 | Aldo-keto reductase family 1 member C3                      | 722  |
| ZNF622   | Q969S3     | Zinc finger protein 622                                     | 22   |
| GEMIN2   | O14893     | Gem-associated protein 2                                    | 28   |
| CYCS     | C9JFR7     | Cytochrome c (Fragment)                                     | 325  |
| DECR1    | Q16698     | 2,4-dienoyl-CoA reductase, mitochondrial                    | 47   |
| EIF4A2   | E7EQG2     | Eukaryotic initiation factor 4A-II                          | 2269 |
| MAT2A    | P31153     | S-adenosylmethionine synthase isoform type-2                | 426  |
| SNRPD1   | P62314     | Small nuclear ribonucleoprotein Sm D1                       | 209  |
| GALNT1   | Q10472     | Polypeptide N-acetylgalactosaminyltransferase 1             | 46   |
| RRP1     | P56182     | Ribosomal RNA processing protein 1 homolog A                | 105  |
| COIL     | P38432     | Coilin                                                      | 23   |
| EIF2B4   | A0A087WW69 | Translation initiation factor eIF-2B subunit delta          | 57   |
| PSMG1    | O95456     | Proteasome assembly chaperone 1                             | 47   |
| ZC3H18   | Q86VM9     | Zinc finger CCH domain-containing protein 18                | 15   |
| GCLM     | P48507     | Glutamate--cysteine ligase regulatory subunit               | 198  |
| PPP6R3   | H7BXH2     | Serine/threonine-protein phosphatase 6 regulatory subunit 3 | 26   |
| BCCIP    | Q9P287     | BRCA2 and CDKN1A-interacting protein                        | 26   |
| TMX1     | Q9H3N1     | Thioredoxin-related transmembrane protein 1                 | 111  |
| SPTBN2   | O15020     | Spectrin beta chain, non-erythrocytic 2                     | 20   |
| LPCAT1   | Q8NF37     | Lysophosphatidylcholine acyltransferase 1                   | 32   |
| RRP1B    | Q14684     | Ribosomal RNA processing protein 1 homolog B                | 58   |
| HIST1H1D | P16402     | Histone H1.3                                                | 492  |
| S100A10  | P60903     | Protein S100-A10                                            | 56   |
| SHMT1    | P34896     | Serine hydroxymethyltransferase, cytosolic                  | 81   |
| RAB14    | P61106     | Ras-related protein Rab-14                                  | 209  |
| TMEM109  | Q9BVC6     | Transmembrane protein 109                                   | 68   |
| KIF4A    | O95239     | Chromosome-associated kinesin KIF4A                         | 36   |
| CRNKL1   | Q9BZJ0     | Crooked neck-like protein 1                                 | 14   |
| WDR77    | Q9BQA1     | Methylosome protein 50                                      | 83   |
| PSME1    | Q06323     | Proteasome activator complex subunit 1                      | 31   |
| NOLC1    | A0A0A0MRM9 | Nucleolar and coiled-body phosphoprotein 1 (Fragment)       | 223  |
| SCAMP3   | O14828     | Secretory carrier-associated membrane protein 3             | 215  |
| NOC2L    | Q9Y3T9     | Nucleolar complex protein 2 homolog                         | 17   |
| CWC15    | Q9P013     | Spliceosome-associated protein CWC15 homolog                | 111  |
| PTPN1    | B4DSN5     | Tyrosine-protein phosphatase non-receptor type              | 61   |
| NRDC     | B1AKJ5     | Nardilysin                                                  | 17   |
| RAB5A    | P20339     | Ras-related protein Rab-5A                                  | 239  |
| PURB     | Q96QR8     | Transcriptional activator protein Pur-beta                  | 148  |
| DNAJC7   | Q99615     | DnaJ homolog subfamily C member 7                           | 199  |
| REEP5    | E2QRG8     | Receptor expression-enhancing protein (Fragment)            | 70   |
| DCTN1    | Q14203     | Dynactin subunit 1                                          | 149  |
| BCAS2    | O75934     | Pre-mRNA-splicing factor SPF27                              | 68   |
| POR      | P16435     | NADPH--cytochrome P450 reductase                            | 20   |

|         |            |                                                                      |      |
|---------|------------|----------------------------------------------------------------------|------|
| PGRMC1  | O00264     | Membrane-associated progesterone receptor component 1                | 330  |
| EIF2AK2 | P19525     | Interferon-induced, double-stranded RNA-activated protein kinase     | 31   |
| GPATCH4 | F8W895     | G patch domain-containing protein 4 (Fragment)                       | 17   |
| GRSF1   | F5H5I6     | G-rich sequence factor 1                                             | 42   |
| C9orf78 | Q9NZ63     | Telomere length and silencing protein 1 homolog                      | 21   |
| DDR GK1 | Q96HY6     | DDR GK domain-containing protein 1                                   | 32   |
| TGFBI   | Q15582     | Transforming growth factor-beta-induced protein ig-h3                | 172  |
| GTF2F1  | P35269     | General transcription factor IIF subunit 1                           | 76   |
| XRN2    | Q9H0D6     | 5'-3' exoribonuclease 2                                              | 108  |
| NPM3    | O75607     | Nucleoplasmin-3                                                      | 328  |
| PE=2    | B4DLN1     | cDNA FLJ60124, highly similar to Mitochondrial dicarboxylate carrier | 107  |
| LMNB2   | Q03252     | Lamin-B2                                                             | 492  |
| TXN     | P10599     | Thioredoxin                                                          | 341  |
| WDR43   | Q15061     | WD repeat-containing protein 43                                      | 71   |
| PEF1    | Q9UBV8     | Peflin                                                               | 53   |
| POLR2E  | A0A087WVZ9 | DNA-directed RNA polymerases I, II, and III subunit RPABC1           | 33   |
| PKM     | P14618-2   | Isoform M1 of Pyruvate kinase PKM                                    | 9299 |
| UHRF1   | Q96T88     | E3 ubiquitin-protein ligase UHRF1                                    | 55   |
| ILKAP   | Q9H0C8     | Integrin-linked kinase-associated serine/threonine phosphatase 2C    | 25   |
| NSF     | P46459     | Vesicle-fusing ATPase                                                | 135  |
| SSR3    | C9JA28     | Translocon-associated protein subunit gamma                          | 171  |
| SART3   | F8VV04     | Squamous cell carcinoma antigen recognized by T-cells 3 (Fragment)   | 29   |
| MRPS18B | A0A0G2JIC6 | 28S ribosomal protein S18b, mitochondrial                            | 51   |
| SPCS3   | P61009     | Signal peptidase complex subunit 3                                   | 25   |
| HMG N1  | P05114     | Non-histone chromosomal protein HMG-14                               | 114  |
| PYCR2   | Q96C36     | Pyroline-5-carboxylate reductase 2                                   | 54   |
| SNRNP40 | Q96DI7     | U5 small nuclear ribonucleoprotein 40 kDa protein                    | 34   |
| NDUFS3  | O75489     | NADH dehydrogenase [ubiquinone] iron-sulfur protein 3, mitochondrial | 128  |
| NCBP3   | K7ELP6     | Nuclear cap-binding protein subunit 3 (Fragment)                     | 17   |
| NELFB   | A0A0X1KG71 | Negative elongation factor B                                         | 98   |
| PLIN3   | O60664     | Perilipin-3                                                          | 480  |
| ASPH    | Q12797     | Aspartyl/asparaginyl beta-hydroxylase                                | 413  |
| TMED10  | P49755     | Transmembrane emp24 domain-containing protein 10                     | 319  |
| CIAO1   | O76071     | Probable cytosolic iron-sulfur protein assembly protein CIAO1        | 21   |
| HLA-A   | P01891     | HLA class I histocompatibility antigen, A-68 alpha chain             | 343  |
| MORF4L2 | Q15014     | Mortality factor 4-like protein 2                                    | 36   |
| NAMPT   | P43490     | Nicotinamide phosphoribosyltransferase                               | 58   |
| ETFA    | P13804     | Electron transfer flavoprotein subunit alpha, mitochondrial          | 184  |
| PSMD12  | O00232     | 26S proteasome non-ATPase regulatory subunit 12                      | 219  |
| RPF2    | Q5VXN0     | Ribosome production factor 2 homolog (Fragment)                      | 50   |
| SOD2    | P04179     | Superoxide dismutase [Mn], mitochondrial                             | 300  |
| PDCD5   | O14737     | Programmed cell death protein 5                                      | 61   |
| RANBP3  | Q9H6Z4     | Ran-binding protein 3                                                | 130  |
| ORC4    | O43929     | Origin recognition complex subunit 4                                 | 30   |

|          |            |                                                                             |      |
|----------|------------|-----------------------------------------------------------------------------|------|
| ZC3H11A  | E9PQ61     | Zinc finger CCCH domain-containing protein 11A                              | 57   |
| CHMP4A   | E9PQ80     | Charged multivesicular body protein 4a (Fragment)                           | 81   |
| BAZ1B    | Q9UIG0     | Tyrosine-protein kinase BAZ1B                                               | 35   |
| PLEC     | Q15149-4   | Isoform 4 of Plectin                                                        | 2304 |
| USO1     | O60763     | General vesicular transport factor p115                                     | 102  |
| CDK6     | Q00534     | Cyclin-dependent kinase 6                                                   | 41   |
| TFRC     | P02786     | Transferrin receptor protein 1                                              | 1677 |
| DDX21    | Q9NR30     | Nucleolar RNA helicase 2                                                    | 515  |
| SRM      | P19623     | Spermidine synthase                                                         | 107  |
| CAPN2    | P17655     | Calpain-2 catalytic subunit                                                 | 249  |
| UCK2     | Q9BZX2     | Uridine-cytidine kinase 2                                                   | 58   |
| SERPINB5 | P36952     | Serpin B5                                                                   | 1169 |
| PNKD     | Q8N490-2   | Isoform 2 of Probable hydrolase PNKD                                        | 48   |
| FNTA     | B3KVN2     | Farnesyltransferase, CAAX box, alpha, isoform CRA_c                         | 30   |
| RBM3     | P98179     | RNA-binding protein 3                                                       | 14   |
| ZFR      | Q96KR1     | Zinc finger RNA-binding protein                                             | 142  |
| PHB      | P35232     | Prohibitin                                                                  | 1022 |
| SH3BGRL3 | Q5T123     | SH3 domain-binding glutamic acid-rich-like protein 3                        | 31   |
| TPX2     | Q9ULW0     | Targeting protein for Xklp2                                                 | 13   |
| VPS26A   | O75436     | Vacuolar protein sorting-associated protein 26A                             | 76   |
| FBL      | M0R299     | rRNA 2'-O-methyltransferase fibrillarlin (Fragment)                         | 54   |
| DNAJA3   | Q96EY1     | DnaJ homolog subfamily A member 3, mitochondrial                            | 53   |
| CEP170   | Q5SW79     | Centrosomal protein of 170 kDa                                              | 16   |
| PSMD6    | Q15008     | 26S proteasome non-ATPase regulatory subunit 6                              | 256  |
| ZPR1     | H7C0E5     | Zinc finger protein ZPR1 (Fragment)                                         | 31   |
| MTMR9    | E9PR67     | Myotubularin-related protein 9                                              | 36   |
| PAIP1    | D6REB4     | Polyadenylate-binding protein-interacting protein 1                         | 158  |
| NDUFA9   | Q16795     | NADH dehydrogenase [ubiquinone] 1 alpha subcomplex subunit 9, mitochondrial | 38   |
| BTF3     | P20290-2   | Isoform 2 of Transcription factor BTF3                                      | 329  |
| PAK2     | Q13177     | Serine/threonine-protein kinase PAK 2                                       | 78   |
| PRMT5    | G3V580     | Protein arginine N-methyltransferase 5 (Fragment)                           | 56   |
| PNO1     | F8WBJ6     | RNA-binding protein PNO1                                                    | 106  |
| SNU13    | P55769     | NHP2-like protein 1                                                         | 248  |
| SRPRB    | Q9Y5M8     | Signal recognition particle receptor subunit beta                           | 463  |
| CTSD     | A0A1B0GVD5 | Cathepsin D                                                                 | 483  |
| S100A16  | Q96FQ6     | Protein S100-A16                                                            | 32   |
| DNAJA2   | O60884     | DnaJ homolog subfamily A member 2                                           | 33   |
| LAMP2    | P13473     | Lysosome-associated membrane glycoprotein 2                                 | 0    |
| PSMD2    | Q13200     | 26S proteasome non-ATPase regulatory subunit 2                              | 830  |
| NPM1     | P06748     | Nucleophosmin                                                               | 4217 |
| EXOSC4   | E9PPI9     | Exosome complex component RRP41                                             | 156  |
| THOC6    | Q86W42     | THO complex subunit 6 homolog                                               | 114  |
| DPP3     | G3V180     | Dipeptidyl peptidase 3                                                      | 172  |
| PDCD6    | O75340     | Programmed cell death protein 6                                             | 518  |
| CAPNS1   | P04632     | Calpain small subunit 1                                                     | 694  |
| HSPH1    | Q92598     | Heat shock protein 105 kDa                                                  | 1900 |
| GTPBP4   | Q9BZE4     | Nucleolar GTP-binding protein 1                                             | 127  |

|          |            |                                                               |      |
|----------|------------|---------------------------------------------------------------|------|
| RBM17    | Q5W011     | Splicing factor 45 (Fragment)                                 | 0    |
| RBM28    | Q9NW13     | RNA-binding protein 28                                        | 67   |
| GSTO1    | P78417     | Glutathione S-transferase omega-1                             | 203  |
| RNF20    | Q5VTR2     | E3 ubiquitin-protein ligase BRE1A                             | 32   |
| UBE2D3   | H9KV45     | Ubiquitin-conjugating enzyme E2 D3                            | 15   |
| MRPS23   | J3QLR8     | 28S ribosomal protein S23, mitochondrial                      | 0    |
| DNAJC2   | Q99543     | DnaJ homolog subfamily C member 2                             | 125  |
| G3BP1    | Q13283     | Ras GTPase-activating protein-binding protein 1               | 959  |
| C7orf50  | Q9BRJ6     | Uncharacterized protein C7orf50                               | 89   |
| SF3B3    | Q15393     | Splicing factor 3B subunit 3                                  | 147  |
| PLOD1    | Q02809     | Procollagen-lysine,2-oxoglutarate 5-dioxygenase 1             | 326  |
| PSMC3    | R4GNH3     | 26S proteasome regulatory subunit 6A                          | 934  |
| MCAM     | P43121     | Cell surface glycoprotein MUC18                               | 171  |
| BOP1     | Q14137     | Ribosome biogenesis protein BOP1                              | 89   |
| CYP51A1  | A0A0C4DFL7 | Lanosterol 14-alpha demethylase                               | 92   |
| IMPDH1   | C9J381     | Inosine-5'-monophosphate dehydrogenase                        | 95   |
| CYB5B    | J3KNF8     | Cytochrome b5 type B                                          | 33   |
| PHB2     | F5GY37     | Prohibitin-2                                                  | 914  |
| FLNC     | Q14315     | Filamin-C                                                     | 1233 |
| ATP5O    | P48047     | ATP synthase subunit O, mitochondrial                         | 403  |
| TMEM50A  | O95807     | Transmembrane protein 50A                                     | 27   |
| NUDT1    | P36639     | 7,8-dihydro-8-oxoguanine triphosphatase                       | 53   |
| CCNB1    | E9PC90     | G2/mitotic-specific cyclin-B1 (Fragment)                      | 34   |
| PODXL    | O00592     | Podocalyxin                                                   | 195  |
| DIAPH1   | O60610     | Protein diaphanous homolog 1                                  | 45   |
| COLGALT1 | Q8NBJ5     | Procollagen galactosyltransferase 1                           | 39   |
| ACO1     | P21399     | Cytoplasmic aconitate hydratase                               | 122  |
| LRRC59   | Q96AG4     | Leucine-rich repeat-containing protein 59                     | 349  |
| HNRNPA0  | Q13151     | Heterogeneous nuclear ribonucleoprotein A0                    | 50   |
| RAB7A    | P51149     | Ras-related protein Rab-7a                                    | 540  |
| DRG1     | Q9Y295     | Developmentally-regulated GTP-binding protein 1               | 72   |
| SWAP70   | Q9UH65     | Switch-associated protein 70                                  | 25   |
| UCHL3    | P15374     | Ubiquitin carboxyl-terminal hydrolase isozyme L3              | 31   |
| POLDIP2  | Q9Y2S7     | Polymerase delta-interacting protein 2                        | 24   |
| USP14    | P54578     | Ubiquitin carboxyl-terminal hydrolase 14                      | 44   |
| SRP72    | O76094     | Signal recognition particle subunit SRP72                     | 184  |
| SEPT9    | Q9UHD8     | Septin-9                                                      | 293  |
| NUFIP2   | Q7Z417     | Nuclear fragile X mental retardation-interacting protein 2    | 33   |
| NOP2     | P46087     | Probable 28S rRNA (cytosine(4447)-C(5))-methyltransferase     | 309  |
| MRE11    | P49959     | Double-strand break repair protein MRE11                      | 49   |
| STIM1    | E9PNJ4     | Stromal interaction molecule 1                                | 21   |
| GLMN     | Q92990     | Glomulin                                                      | 44   |
| LARP1    | Q6PKG0     | La-related protein 1                                          | 262  |
| EIF2S3   | P41091     | Eukaryotic translation initiation factor 2 subunit 3          | 283  |
| RAB5C    | P51148     | Ras-related protein Rab-5C                                    | 800  |
| TOMM70   | O94826     | Mitochondrial import receptor subunit TOM70                   | 36   |
| PAPSS2   | O95340     | Bifunctional 3'-phosphoadenosine 5'-phosphosulfate synthase 2 | 28   |



|           |            |                                                           |      |
|-----------|------------|-----------------------------------------------------------|------|
| YRDC      | Q86U90     | YrdC domain-containing protein, mitochondrial             | 40   |
| IPO7      | O95373     | Importin-7                                                | 1592 |
| DKC1      | O60832     | H/ACA ribonucleoprotein complex subunit 4                 | 156  |
| PTGR1     | Q14914     | Prostaglandin reductase 1                                 | 21   |
| SEC61B    | P60468     | Protein transport protein Sec61 subunit beta              | 55   |
| UBE3A     | Q05086     | Ubiquitin-protein ligase E3A                              | 19   |
| VAMP7     | P51809     | Vesicle-associated membrane protein 7                     | 43   |
| CARS      | B4DKY1     | Cysteine--tRNA ligase, cytoplasmic                        | 30   |
| NUP205    | Q92621     | Nuclear pore complex protein Nup205                       | 29   |
| NUP155    | O75694     | Nuclear pore complex protein Nup155                       | 140  |
| ANXA1     | P04083     | Annexin A1                                                | 5098 |
| ARL8B     | Q9NVJ2     | ADP-ribosylation factor-like protein 8B                   | 52   |
| NUP43     | Q8NFB3     | Nucleoporin Nup43                                         | 37   |
| SKP1      | E5RJR5     | S-phase kinase-associated protein 1                       | 414  |
| DNAJA1    | P31689     | DnaJ homolog subfamily A member 1                         | 383  |
| C1orf174  | Q8IYL3     | UPF0688 protein C1orf174                                  | 59   |
| RCN1      | Q15293     | Reticulocalbin-1                                          | 289  |
| MYDGF     | Q969H8     | Myeloid-derived growth factor                             | 46   |
| PSMB3     | P49720     | Proteasome subunit beta type-3                            | 280  |
| PSMA3     | P25788     | Proteasome subunit alpha type-3                           | 448  |
| CSNK1A1   | P48729     | Casein kinase I isoform alpha                             | 106  |
| HSPB8     | Q9UJY1     | Heat shock protein beta-8                                 | 17   |
| PPP1CC    | A0A087WYY5 | Serine/threonine-protein phosphatase                      | 455  |
| CPSF7     | Q8N684     | Cleavage and polyadenylation specificity factor subunit 7 | 55   |
| PFDN2     | Q9UHV9     | Prefoldin subunit 2                                       | 281  |
| MMTAG2    | Q9BU76     | Multiple myeloma tumor-associated protein 2               | 23   |
| PFN2      | C9J0J7     | Profilin                                                  | 240  |
| HIST2H2BE | Q16778     | Histone H2B type 2-E                                      | 7385 |
| NUP133    | Q8WUM0     | Nuclear pore complex protein Nup133                       | 29   |
| HIST2H2BF | Q5QNW6     | Histone H2B type 2-F                                      | 7980 |
| GLS       | O94925-3   | Isoform 3 of Glutaminase kidney isoform, mitochondrial    | 1292 |
| RAB11A    | P62491     | Ras-related protein Rab-11A                               | 259  |
| UCHL5     | Q9Y5K5     | Ubiquitin carboxyl-terminal hydrolase isozyme L5          | 36   |
| ANXA7     | P20073     | Annexin A7                                                | 83   |
| S100A11   | P31949     | Protein S100-A11                                          | 293  |
| API5      | Q9BZZ5     | Apoptosis inhibitor 5                                     | 60   |
| NAP1L1    | F8W543     | Nucleosome assembly protein 1-like 1                      | 639  |
| FAM129B   | Q96TA1     | Niban-like protein 1                                      | 416  |
| PSMC2     | P35998     | 26S proteasome regulatory subunit 7                       | 784  |
| PSMC6     | A0A087X2I1 | 26S proteasome regulatory subunit 10B                     | 309  |
| PSMC4     | P43686     | 26S proteasome regulatory subunit 6B                      | 549  |
| SPR       | P35270     | Sepiapterin reductase                                     | 70   |
| GSR       | P00390     | Glutathione reductase, mitochondrial                      | 175  |
| PGLS      | M0R261     | 6-phosphogluconolactonase (Fragment)                      | 115  |
| STOML2    | Q9UJZ1     | Stomatin-like protein 2, mitochondrial                    | 903  |
| LGALS3    | P17931     | Galectin-3                                                | 45   |
| UAP1      | Q16222     | UDP-N-acetylhexosamine pyrophosphorylase                  | 159  |
| NANS      | Q9NR45     | Sialic acid synthase                                      | 97   |

|                |          |                                                                                                                  |      |
|----------------|----------|------------------------------------------------------------------------------------------------------------------|------|
| ILF3           | Q12906   | Interleukin enhancer-binding factor 3                                                                            | 981  |
| PTGES2         | Q9H7Z7   | Prostaglandin E synthase 2                                                                                       | 76   |
| NAA15          | Q9BXJ9   | N-alpha-acetyltransferase 15, NatA auxiliary subunit                                                             | 106  |
| PPP3CB         | Q5F2F8   | Serine/threonine-protein phosphatase                                                                             | 64   |
| NOL7           | H7C2B1   | Nucleolar protein 7 (Fragment)                                                                                   | 84   |
| DLST           | P36957   | Dihydrolipoyllysine-residue succinyltransferase component of 2-oxoglutarate dehydrogenase complex, mitochondrial | 452  |
| SLC2A1         | P11166   | Solute carrier family 2, facilitated glucose transporter member 1                                                | 160  |
| UFD1           | Q92890-1 | Isoform Long of Ubiquitin recognition factor in ER-associated degradation protein 1                              | 16   |
| RRS1           | Q15050   | Ribosome biogenesis regulatory protein homolog                                                                   | 97   |
| SSR1           | C9J3L8   | Translocon-associated protein subunit alpha                                                                      | 152  |
| MAGOH          | P61326   | Protein mago nashi homolog                                                                                       | 109  |
| RPS27A         | J3QTR3   | Ubiquitin-40S ribosomal protein S27a (Fragment)                                                                  | 519  |
| CNDP2          | J3QKT2   | Cytosolic non-specific dipeptidase (Fragment)                                                                    | 145  |
| NCAPD2         | Q15021   | Condensin complex subunit 1                                                                                      | 61   |
| PRKCSH         | K7ELL7   | Glucosidase 2 subunit beta                                                                                       | 550  |
| ARFGAP1        | E5RHT6   | ADP-ribosylation factor GTPase-activating protein 1 (Fragment)                                                   | 75   |
| EEF1D          | P29692-3 | Isoform 3 of Elongation factor 1-delta                                                                           | 1666 |
| NMD3           | Q96D46   | 60S ribosomal export protein NMD3                                                                                | 19   |
| EEF1E1-BLOC1S5 | C9J1V9   | EEF1E1-BLOC1S5 readthrough (NMD candidate)                                                                       | 248  |
| PSMD11         | O00231   | 26S proteasome non-ATPase regulatory subunit 11                                                                  | 754  |
| PSMC1          | P62191   | 26S proteasome regulatory subunit 4                                                                              | 491  |
| PAK4           | O96013   | Serine/threonine-protein kinase PAK 4                                                                            | 33   |
| CCDC51         | Q96ER9   | Coiled-coil domain-containing protein 51                                                                         | 21   |
| SPC25          | C9JW94   | Kinetochores protein Spc25 (Fragment)                                                                            | 51   |
| GANAB          | Q14697   | Neutral alpha-glucosidase AB                                                                                     | 1335 |
| BYSL           | Q13895   | Bystin                                                                                                           | 60   |
| RPS6KA6        | Q9UK32   | Ribosomal protein S6 kinase alpha-6                                                                              | 0    |
| AP1G1          | O43747   | AP-1 complex subunit gamma-1                                                                                     | 18   |
| ATP2B2         | Q01814   | Plasma membrane calcium-transporting ATPase 2                                                                    | 33   |
| PSME3          | P61289   | Proteasome activator complex subunit 3                                                                           | 1018 |
| ATP2A2         | P16615   | Sarcoplasmic/endoplasmic reticulum calcium ATPase 2                                                              | 72   |
| CLIC1          | O00299   | Chloride intracellular channel protein 1                                                                         | 1430 |
| SEC24C         | G5EA31   | Protein transport protein Sec24C                                                                                 | 22   |
| ATL3           | Q6DD88   | Atlastin-3                                                                                                       | 33   |
| UBE2M          | P61081   | NEDD8-conjugating enzyme Ubc12                                                                                   | 93   |
| YBX3           | P16989   | Y-box-binding protein 3                                                                                          | 540  |
| HSPA9          | P38646   | Stress-70 protein, mitochondrial                                                                                 | 6689 |
| CHMP4B         | Q9H444   | Charged multivesicular body protein 4b                                                                           | 188  |
| SSR4           | P51571   | Translocon-associated protein subunit delta                                                                      | 194  |
| SMARCE1        | H7C048   | SWI/SNF-related matrix-associated actin-dependent regulator of chromatin subfamily E member 1 (Fragment)         | 30   |
| LAP3           | P28838   | Cytosol aminopeptidase                                                                                           | 113  |
| CDC5L          | Q99459   | Cell division cycle 5-like protein                                                                               | 48   |
| VASP           | P50552   | Vasodilator-stimulated phosphoprotein                                                                            | 265  |
| NDUFV2         | E7EPT4   | NADH dehydrogenase [ubiquinone] flavoprotein 2, mitochondrial                                                    | 60   |

|          |            |                                                                      |      |
|----------|------------|----------------------------------------------------------------------|------|
| CHMP1A   | F8VUA2     | Charged multivesicular body protein 1a                               | 71   |
| HSD17B4  | P51659     | Peroxisomal multifunctional enzyme type 2                            | 278  |
| PSMA7    | O14818     | Proteasome subunit alpha type-7                                      | 676  |
| S100A6   | P06703     | Protein S100-A6                                                      | 53   |
| SHMT2    | P34897     | Serine hydroxymethyltransferase, mitochondrial                       | 1141 |
| SNRPD2   | P62316     | Small nuclear ribonucleoprotein Sm D2                                | 240  |
| HSD17B10 | Q99714     | 3-hydroxyacyl-CoA dehydrogenase type-2                               | 658  |
| MTDH     | Q86UE4     | Protein LYRIC                                                        | 107  |
| PES1     | B5MCF9     | Pescadillo homolog                                                   | 130  |
| XPNPEP1  | Q9NQW7     | Xaa-Pro aminopeptidase 1                                             | 17   |
| LMO7     | E9PMT2     | LIM domain only protein 7                                            | 160  |
| SRSF4    | A0A0D9SEM4 | Serine/arginine-rich-splicing factor 4 (Fragment)                    | 73   |
| OPA1     | O60313     | Dynamin-like 120 kDa protein, mitochondrial                          | 94   |
| GOPC     | Q9HD26     | Golgi-associated PDZ and coiled-coil motif-containing protein        | 22   |
| CCT5     | P48643     | T-complex protein 1 subunit epsilon                                  | 2346 |
| PSMC5    | P62195     | 26S proteasome regulatory subunit 8                                  | 448  |
| DNAJB1   | P25685     | DnaJ homolog subfamily B member 1                                    | 292  |
| LMAN2    | Q12907     | Vesicular integral-membrane protein VIP36                            | 53   |
| SRRT     | Q9BXP5     | Serrate RNA effector molecule homolog                                | 311  |
| WDR70    | Q9NW82     | WD repeat-containing protein 70                                      | 15   |
| ACSL3    | O95573     | Long-chain-fatty-acid--CoA ligase 3                                  | 87   |
| TOMM22   | Q9NS69     | Mitochondrial import receptor subunit TOM22 homolog                  | 980  |
| NDUFS8   | O00217     | NADH dehydrogenase [ubiquinone] iron-sulfur protein 8, mitochondrial | 25   |
| ACIN1    | Q9UKV3     | Apoptotic chromatin condensation inducer in the nucleus              | 60   |
| RANBP6   | O60518     | Ran-binding protein 6                                                | 219  |
| HNRNPH1  | E9PCY7     | Heterogeneous nuclear ribonucleoprotein H                            | 2153 |
| VTA1     | A0A087WY55 | Chromosome 6 open reading frame 55, isoform CRA_b                    | 142  |
| G3BP2    | Q9UN86     | Ras GTPase-activating protein-binding protein 2                      | 305  |
| CTSA     | P10619     | Lysosomal protective protein                                         | 212  |
| MISP     | Q8IVT2     | Mitotic interactor and substrate of PLK1                             | 20   |
| SEPT11   | D6RER5     | Septin-11                                                            | 224  |
| XPO5     | Q9HAV4     | Exportin-5                                                           | 381  |
| PBK      | Q96KB5     | Lymphokine-activated killer T-cell-originated protein kinase         | 14   |
| SRSF7    | Q16629     | Serine/arginine-rich splicing factor 7                               | 25   |
| PSMD10   | B1AJY5     | 26S proteasome non-ATPase regulatory subunit 10                      | 54   |
| AGPS     | O00116     | Alkyldihydroxyacetonephosphate synthase, peroxisomal                 | 273  |
| RSL1D1   | O76021     | Ribosomal L1 domain-containing protein 1                             | 445  |
| TCEAL4   | D6RD44     | Transcription elongation factor A protein-like 4 (Fragment)          | 41   |
| SLTM     | H0YNF3     | SAFB-like transcription modulator (Fragment)                         | 97   |
| NCAPH    | E9PHA2     | Condensin complex subunit 2                                          | 30   |
| TMED2    | Q15363     | Transmembrane emp24 domain-containing protein 2                      | 45   |
| COX4I1   | P13073     | Cytochrome c oxidase subunit 4 isoform 1, mitochondrial              | 130  |
| KIF2A    | O00139     | Kinesin-like protein KIF2A                                           | 37   |
| CLTA     | P09496-2   | Isoform Non-brain of Clathrin light chain A                          | 266  |
| TPT1     | Q5W0H4     | Translationally-controlled tumor protein                             | 523  |
| PRPF6    | O94906     | Pre-mRNA-processing factor 6                                         | 320  |
| DEK      | B4DFG0     | Protein DEK                                                          | 139  |

|           |            |                                                                         |      |
|-----------|------------|-------------------------------------------------------------------------|------|
| LRRK1     | H0YEW1     | Leucine-rich repeat serine/threonine-protein kinase 1 (Fragment)        | 0    |
| RPS28     | P62857     | 40S ribosomal protein S28                                               | 43   |
| RPL21     | P46778     | 60S ribosomal protein L21                                               | 69   |
| ECHS1     | P30084     | Enoyl-CoA hydratase, mitochondrial                                      | 155  |
| DNM1L     | G8JLD5     | Dynammin-1-like protein                                                 | 199  |
| RPA2      | P15927     | Replication protein A 32 kDa subunit                                    | 87   |
| CBX3      | Q13185     | Chromobox protein homolog 3                                             | 401  |
| XPOT      | O43592     | Exportin-T                                                              | 62   |
| WDR5      | P61964     | WD repeat-containing protein 5                                          | 18   |
| TPR       | P12270     | Nucleoprotein TPR                                                       | 208  |
| BLMH      | K7ESE8     | Bleomycin hydrolase (Fragment)                                          | 95   |
| CACYBP    | Q9HB71     | Calcyclin-binding protein                                               | 488  |
| MARS      | P56192     | Methionine--tRNA ligase, cytoplasmic                                    | 689  |
| SEPT2     | Q15019     | Septin-2                                                                | 359  |
| EIF3F     | O00303     | Eukaryotic translation initiation factor 3 subunit F                    | 541  |
| GOT2      | P00505     | Aspartate aminotransferase, mitochondrial                               | 557  |
| MCMBP     | Q9BTE3     | Mini-chromosome maintenance complex-binding protein                     | 23   |
| BZW1      | Q7L1Q6     | Basic leucine zipper and W2 domain-containing protein 1                 | 290  |
| ANXA5     | P08758     | Annexin A5                                                              | 4455 |
| PSMB5     | P28074     | Proteasome subunit beta type-5                                          | 269  |
| HNRNPDL   | O14979-2   | Isoform 2 of Heterogeneous nuclear ribonucleoprotein D-like             | 909  |
| CDK1      | P06493     | Cyclin-dependent kinase 1                                               | 331  |
| CLPX      | O76031     | ATP-dependent Clp protease ATP-binding subunit clpX-like, mitochondrial | 80   |
| RTFDC1    | A0A0A0MQR2 | Protein RTF2 homolog                                                    | 60   |
| CUL2      | Q13617     | Cullin-2                                                                | 29   |
| U2AF1     | Q01081     | Splicing factor U2AF 35 kDa subunit                                     | 646  |
| HSPE1     | P61604     | 10 kDa heat shock protein, mitochondrial                                | 580  |
| HIST2H2AB | Q8IUE6     | Histone H2A type 2-B                                                    | 916  |
| TRIM28    | Q13263     | Transcription intermediary factor 1-beta                                | 609  |
| DDX46     | A0A0C4DG89 | Probable ATP-dependent RNA helicase DDX46                               | 188  |
| PSMA6     | P60900     | Proteasome subunit alpha type-6                                         | 526  |
| LRPPRC    | P42704     | Leucine-rich PPR motif-containing protein, mitochondrial                | 1087 |
| EIF3J     | O75822     | Eukaryotic translation initiation factor 3 subunit J                    | 376  |
| VDAC1     | P21796     | Voltage-dependent anion-selective channel protein 1                     | 1296 |
| RPL12     | P30050     | 60S ribosomal protein L12                                               | 314  |
| EXOSC6    | Q5RKV6     | Exosome complex component MTR3                                          | 100  |
| CLPB      | Q9H078     | Caseinolytic peptidase B protein homolog                                | 68   |
| RPS8      | P62241     | 40S ribosomal protein S8                                                | 984  |
| VAPB      | O95292     | Vesicle-associated membrane protein-associated protein B/C              | 145  |
| RCC1      | P18754     | Regulator of chromosome condensation                                    | 168  |
| RAB35     | F5H157     | Ras-related protein Rab-35 (Fragment)                                   | 51   |
| FLNB      | O75369     | Filamin-B                                                               | 1601 |
| OAT       | P04181     | Ornithine aminotransferase, mitochondrial                               | 159  |
| RPS3A     | P61247     | 40S ribosomal protein S3a                                               | 960  |
| TXLNA     | P40222     | Alpha-taxilin                                                           | 46   |
| RAD50     | Q92878     | DNA repair protein RAD50                                                | 19   |

|          |            |                                                                       |      |
|----------|------------|-----------------------------------------------------------------------|------|
| CTNBL1   | Q8WYA6     | Beta-catenin-like protein 1                                           | 95   |
| MKI67    | P46013     | Proliferation marker protein Ki-67                                    | 49   |
| SNRNPB2  | P08579     | U2 small nuclear ribonucleoprotein B"                                 | 403  |
| SLC4A1AP | A0A087X0M4 | Kanadaptin                                                            | 38   |
| AKR1B1   | P15121     | Aldose reductase                                                      | 302  |
| CYB5R3   | P00387     | NADH-cytochrome b5 reductase 3                                        | 181  |
| ADPRHL2  | Q9NX46     | Poly(ADP-ribose) glycohydrolase ARH3                                  | 13   |
| BCLAF1   | E9PK91     | Bcl-2-associated transcription factor 1                               | 33   |
| AK2      | P54819     | Adenylate kinase 2, mitochondrial                                     | 395  |
| ESD      | P10768     | S-formylglutathione hydrolase                                         | 45   |
| COX5A    | H3BNX8     | Cytochrome c oxidase subunit 5A, mitochondrial                        | 68   |
| CDC73    | Q6P1J9     | Parafibromin                                                          | 105  |
| RPL19    | P84098     | 60S ribosomal protein L19                                             | 497  |
| AIMP1    | Q12904     | Aminoacyl tRNA synthase complex-interacting multifunctional protein 1 | 29   |
| CKAP5    | Q14008     | Cytoskeleton-associated protein 5                                     | 32   |
| SYF2     | O95926     | Pre-mRNA-splicing factor SYF2                                         | 38   |
| FLII     | Q13045     | Protein flightless-1 homolog                                          | 231  |
| PIIB     | P23284     | Peptidyl-prolyl cis-trans isomerase B                                 | 1628 |
| NARS     | O43776     | Asparagine--tRNA ligase, cytoplasmic                                  | 527  |
| TALDO1   | P37837     | Transaldolase                                                         | 504  |
| PDAP1    | Q13442     | 28 kDa heat- and acid-stable phosphoprotein                           | 101  |
| PON2     | Q15165-1   | Isoform 1 of Serum paraoxonase/arylesterase 2                         | 131  |
| ANXA11   | P50995     | Annexin A11                                                           | 0    |
| PLEKHA2  | A8K727     | Pleckstrin homology domain-containing family A member 2               | 33   |
| RPL22    | K7ERI7     | 60S ribosomal protein L22                                             | 276  |
| RPS12    | P25398     | 40S ribosomal protein S12                                             | 1233 |
| RAB2A    | P61019     | Ras-related protein Rab-2A                                            | 323  |
| PSAT1    | Q9Y617     | Phosphoserine aminotransferase                                        | 734  |
| GMPS     | P49915     | GMP synthase [glutamine-hydrolyzing]                                  | 320  |
| MTX2     | F8WE26     | Metaxin-2                                                             | 98   |
| EIF3K    | Q9UBQ5     | Eukaryotic translation initiation factor 3 subunit K                  | 159  |
| HM13     | A0A0C4DGU3 | Minor histocompatibility antigen H13                                  | 0    |
| CCT2     | P78371     | T-complex protein 1 subunit beta                                      | 3186 |
| DDX3X    | O00571     | ATP-dependent RNA helicase DDX3X                                      | 1744 |
| RPL4     | P36578     | 60S ribosomal protein L4                                              | 790  |
| RPL3     | P39023     | 60S ribosomal protein L3                                              | 254  |
| CCT4     | P50991     | T-complex protein 1 subunit delta                                     | 2621 |
| RPL17    | J3KRX5     | 60S ribosomal protein L17 (Fragment)                                  | 308  |
| SFXN1    | Q9H9B4     | Sideroflexin-1                                                        | 303  |
| UBXN1    | Q04323     | UBX domain-containing protein 1                                       | 413  |
| EXOC4    | Q96A65     | Exocyst complex component 4                                           | 36   |
| HNRNPH3  | P31942     | Heterogeneous nuclear ribonucleoprotein H3                            | 231  |
| BUB1B    | O60566     | Mitotic checkpoint serine/threonine-protein kinase BUB1 beta          | 72   |
| EFTUD2   | Q15029     | 116 kDa U5 small nuclear ribonucleoprotein component                  | 658  |
| SLC39A10 | Q9ULF5     | Zinc transporter ZIP10                                                | 24   |
| SRGAP2   | O75044     | SLIT-ROBO Rho GTPase-activating protein 2                             | 27   |
| COPE     | O14579     | Coatomer subunit epsilon                                              | 213  |

|          |            |                                                                        |      |
|----------|------------|------------------------------------------------------------------------|------|
| MTCH2    | E9PIE4     | Mitochondrial carrier homolog 2 (Fragment)                             | 548  |
| BCO1     | H3BPA2     | Beta,beta-carotene 15,15'-dioxygenase                                  | 32   |
| DDX6     | P26196     | Probable ATP-dependent RNA helicase DDX6                               | 37   |
| UBA6     | A0AVT1     | Ubiquitin-like modifier-activating enzyme 6                            | 14   |
| STRAP    | Q9Y3F4     | Serine-threonine kinase receptor-associated protein                    | 885  |
| DDX18    | Q9NVP1     | ATP-dependent RNA helicase DDX18                                       | 127  |
| NSDHL    | C9JDR0     | Sterol-4-alpha-carboxylate 3-dehydrogenase, decarboxylating (Fragment) | 68   |
| PMPCB    | O75439     | Mitochondrial-processing peptidase subunit beta                        | 111  |
| RCN2     | Q14257     | Reticulocalbin-2                                                       | 21   |
| CCT7     | Q99832     | T-complex protein 1 subunit eta                                        | 1862 |
| RPL34    | P49207     | 60S ribosomal protein L34                                              | 67   |
| RAD23B   | P54727     | UV excision repair protein RAD23 homolog B                             | 84   |
| P3H1     | Q32P28     | Prolyl 3-hydroxylase 1                                                 | 188  |
| TMEM41B  | Q5BJD5     | Transmembrane protein 41B                                              | 0    |
| DCXR     | J3KS22     | L-xylulose reductase (Fragment)                                        | 110  |
| H2AFY    | O75367     | Core histone macro-H2A.1                                               | 428  |
| RPS14    | P62263     | 40S ribosomal protein S14                                              | 570  |
| SARS     | Q5T5C7     | Serine--tRNA ligase, cytoplasmic                                       | 236  |
| PTPMT1   | Q8WUK0     | Phosphatidylglycerophosphatase and protein-tyrosine phosphatase 1      | 25   |
| KPNA1    | C9JWD9     | Importin subunit alpha-5 (Fragment)                                    | 42   |
| SSBP1    | Q04837     | Single-stranded DNA-binding protein, mitochondrial                     | 309  |
| INPPL1   | A0A0A0MTP6 | Phosphatidylinositol 3,4,5-trisphosphate 5-phosphatase 2               | 62   |
| PRPF19   | Q9UMS4     | Pre-mRNA-processing factor 19                                          | 279  |
| CANX     | P27824     | Calnexin                                                               | 1742 |
| PGD      | P52209     | 6-phosphogluconate dehydrogenase, decarboxylating                      | 1425 |
| KNSTRN   | Q9Y448     | Small kinetochore-associated protein                                   | 20   |
| TSN      | Q15631     | Translin                                                               | 46   |
| SUMF2    | Q8NBJ7     | Sulfatase-modifying factor 2                                           | 36   |
| HIST1H1B | P16401     | Histone H1.5                                                           | 361  |
| IGF2BP2  | Q9Y6M1     | Insulin-like growth factor 2 mRNA-binding protein 2                    | 144  |
| PRKACA   | K7ERP6     | cAMP-dependent protein kinase catalytic subunit alpha (Fragment)       | 92   |
| PRDX4    | H7C3T4     | Peroxisome oxidoreductin-4 (Fragment)                                  | 385  |
| PHF6     | A0A0D9SGE8 | PHD finger protein 6                                                   | 36   |
| PDIA3    | P30101     | Protein disulfide-isomerase A3                                         | 2620 |
| SFPQ     | P23246     | Splicing factor, proline- and glutamine-rich                           | 946  |
| C1QBP    | Q07021     | Complement component 1 Q subcomponent-binding protein, mitochondrial   | 978  |
| UPF1     | Q92900     | Regulator of nonsense transcripts 1                                    | 108  |
| BCAP31   | P51572     | B-cell receptor-associated protein 31                                  | 62   |
| CHCHD3   | C9JRZ6     | MICOS complex subunit                                                  | 68   |
| GALNT2   | Q10471     | Polypeptide N-acetylgalactosaminyltransferase 2                        | 268  |
| SET      | Q01105-2   | Isoform 2 of Protein SET                                               | 1633 |
| DYNC1LI1 | Q9Y6G9     | Cytoplasmic dynein 1 light intermediate chain 1                        | 26   |
| GRPEL1   | Q9HAV7     | GrpE protein homolog 1, mitochondrial                                  | 21   |
| FAM162A  | F8W7Q4     | Protein FAM162A                                                        | 37   |
| USP10    | Q14694     | Ubiquitin carboxyl-terminal hydrolase 10                               | 26   |

|              |            |                                                                                               |      |
|--------------|------------|-----------------------------------------------------------------------------------------------|------|
| ILF2         | B4DY09     | Interleukin enhancer-binding factor 2                                                         | 1573 |
| NT5DC1       | Q5TFE4     | 5'-nucleotidase domain-containing protein 1                                                   | 21   |
| IARS         | A0A0A0MSX9 | Isoleucine--tRNA ligase, cytoplasmic                                                          | 433  |
| SAFB         | Q15424     | Scaffold attachment factor B1                                                                 | 107  |
| CKAP4        | Q07065     | Cytoskeleton-associated protein 4                                                             | 886  |
| ARCN1        | P48444     | Coatmer subunit delta                                                                         | 112  |
| SMARCA5      | O60264     | SWI/SNF-related matrix-associated actin-dependent regulator of chromatin subfamily A member 5 | 57   |
| SORD         | Q00796     | Sorbitol dehydrogenase                                                                        | 154  |
| U2AF2        | P26368     | Splicing factor U2AF 65 kDa subunit                                                           | 131  |
| IMMT         | B9A067     | MICOS complex subunit MIC60                                                                   | 163  |
| PPP6C        | O00743     | Serine/threonine-protein phosphatase 6 catalytic subunit                                      | 30   |
| PPP2CA       | P67775     | Serine/threonine-protein phosphatase 2A catalytic subunit alpha isoform                       | 238  |
| CCDC6        | Q16204     | Coiled-coil domain-containing protein 6                                                       | 29   |
| PSMA4        | P25789     | Proteasome subunit alpha type-4                                                               | 455  |
| BAG2         | O95816     | BAG family molecular chaperone regulator 2                                                    | 481  |
| CAPG         | P40121     | Macrophage-capping protein                                                                    | 486  |
| GLRX3        | O76003     | Glutaredoxin-3                                                                                | 475  |
| RBX1         | P62877     | E3 ubiquitin-protein ligase RBX1                                                              | 64   |
| TIMM50       | Q3ZCQ8     | Mitochondrial import inner membrane translocase subunit TIM50                                 | 96   |
| ATP5J2-PTCD1 | G3V325     | ATP5J2-PTCD1 readthrough                                                                      | 183  |
| SMS          | P52788     | Spermine synthase                                                                             | 0    |
| CDKN2C       | P42773     | Cyclin-dependent kinase 4 inhibitor C                                                         | 14   |
| TMEM43       | Q9BTV4     | Transmembrane protein 43                                                                      | 53   |
| HAX1         | Q5VYD6     | HCLS1-associated protein X-1 (Fragment)                                                       | 32   |
| NOP58        | Q9Y2X3     | Nucleolar protein 58                                                                          | 1154 |
| ERH          | P84090     | Enhancer of rudimentary homolog                                                               | 100  |
| RPL28        | H0YKD8     | 60S ribosomal protein L28                                                                     | 173  |
| MSH6         | P52701     | DNA mismatch repair protein Msh6                                                              | 62   |
| SNW1         | G3V3A4     | SNW domain-containing protein 1                                                               | 70   |
| VBP1         | P61758     | Prefoldin subunit 3                                                                           | 204  |
| SMC1A        | Q14683     | Structural maintenance of chromosomes protein 1A                                              | 31   |
| PPIL1        | Q9Y3C6     | Peptidyl-prolyl cis-trans isomerase-like 1                                                    | 41   |
| FAF2         | Q96CS3     | FAS-associated factor 2                                                                       | 21   |
| ZC3HAV1      | Q7Z2W4     | Zinc finger CCCH-type antiviral protein 1                                                     | 232  |
| HNRNPH2      | P55795     | Heterogeneous nuclear ribonucleoprotein H2                                                    | 1266 |
| RPP30        | Q5VU11     | Ribonuclease P protein subunit p30 (Fragment)                                                 | 110  |
| BAG3         | O95817     | BAG family molecular chaperone regulator 3                                                    | 104  |
| FKBP3        | Q00688     | Peptidyl-prolyl cis-trans isomerase FKBP3                                                     | 317  |
| UBE2K        | P61086     | Ubiquitin-conjugating enzyme E2 K                                                             | 111  |
| FABP5        | Q01469     | Fatty acid-binding protein, epidermal                                                         | 197  |
| COASY        | Q13057     | Bifunctional coenzyme A synthase                                                              | 105  |
| CDK4         | P11802     | Cyclin-dependent kinase 4                                                                     | 60   |
| SF3B4        | Q15427     | Splicing factor 3B subunit 4                                                                  | 149  |
| HELLS        | Q9NRZ9     | Lymphoid-specific helicase                                                                    | 33   |
| RPL15        | P61313     | 60S ribosomal protein L15                                                                     | 575  |
| BST2         | Q10589     | Bone marrow stromal antigen 2                                                                 | 147  |

|          |            |                                                                             |       |
|----------|------------|-----------------------------------------------------------------------------|-------|
| HSPD1    | P10809     | 60 kDa heat shock protein, mitochondrial                                    | 17921 |
| RPL23    | P62829     | 60S ribosomal protein L23                                                   | 260   |
| EEF1A1   | P68104     | Elongation factor 1-alpha 1                                                 | 3459  |
| RAB31    | Q13636     | Ras-related protein Rab-31                                                  | 22    |
| RBM26    | Q5T8P6     | RNA-binding protein 26                                                      | 103   |
| CPSF6    | F8WJN3     | Cleavage and polyadenylation-specificity factor subunit 6                   | 165   |
| PSMA5    | P28066     | Proteasome subunit alpha type-5                                             | 268   |
| AP2B1    | A0A087X253 | AP complex subunit beta                                                     | 332   |
| RALA     | P11233     | Ras-related protein Ral-A                                                   | 176   |
| CCT8     | P50990     | T-complex protein 1 subunit theta                                           | 3067  |
| NUDT5    | A6NFX8     | ADP-sugar pyrophosphatase                                                   | 263   |
| RAB15    | J3QSF4     | Ras-related protein Rab-15 (Fragment)                                       | 240   |
| CCT3     | P49368     | T-complex protein 1 subunit gamma                                           | 2247  |
| EEA1     | Q15075     | Early endosome antigen 1                                                    | 19    |
| RPL11    | P62913     | 60S ribosomal protein L11                                                   | 1107  |
| RALY     | Q5QPL9     | RNA-binding protein Raly (Fragment)                                         | 149   |
| CAPRIN1  | Q14444     | Caprin-1                                                                    | 419   |
| ANP32B   | Q92688     | Acidic leucine-rich nuclear phosphoprotein 32 family member B               | 345   |
| SPATS2L  | Q9NUQ6     | SPATS2-like protein                                                         | 74    |
| HNRNPA1  | F8W6I7     | Heterogeneous nuclear ribonucleoprotein A1                                  | 2409  |
| SLC25A11 | Q02978     | Mitochondrial 2-oxoglutarate/malate carrier protein                         | 100   |
| PSIP1    | O75475     | PC4 and SFRS1-interacting protein                                           | 220   |
| CAVIN3   | E9PIE3     | Caveolae-associated protein 3                                               | 36    |
| AK1      | P00568     | Adenylate kinase isoenzyme 1                                                | 81    |
| CUL4A    | Q13619     | Cullin-4A                                                                   | 185   |
| SRP19    | A0A087WYR0 | Signal recognition particle 19 kDa protein                                  | 89    |
| MRPS34   | C9JJ19     | 28S ribosomal protein S34, mitochondrial                                    | 65    |
| KPNA2    | P52292     | Importin subunit alpha-1                                                    | 1703  |
| RPL35    | P42766     | 60S ribosomal protein L35                                                   | 103   |
| PSMA1    | P25786     | Proteasome subunit alpha type-1                                             | 92    |
| ABHD10   | Q9NUJ1     | Mycophenolic acid acyl-glucuronide esterase, mitochondrial                  | 19    |
| FAM50A   | B0S8I6     | Protein FAM50A (Fragment)                                                   | 28    |
| THOC2    | Q8NI27     | THO complex subunit 2                                                       | 250   |
| PTPA     | F6WIT2     | Serine/threonine-protein phosphatase 2A activator                           | 72    |
| PRPS1    | P60891     | Ribose-phosphate pyrophosphokinase 1                                        | 77    |
| NT5C3A   | X6RM59     | 5'-nucleotidase                                                             | 32    |
| CCT6A    | P40227     | T-complex protein 1 subunit zeta                                            | 1530  |
| FARSA    | Q9Y285     | Phenylalanine--tRNA ligase alpha subunit                                    | 627   |
| ERP29    | P30040     | Endoplasmic reticulum resident protein 29                                   | 988   |
| HNRNPL   | P14866     | Heterogeneous nuclear ribonucleoprotein L                                   | 704   |
| ARF5     | C9J1Z8     | ADP-ribosylation factor 5 (Fragment)                                        | 189   |
| EWSR1    | B0QYK0     | RNA-binding protein EWS                                                     | 92    |
| NDUFB11  | Q9NX14     | NADH dehydrogenase [ubiquinone] 1 beta subcomplex subunit 11, mitochondrial | 15    |
| FAM120A  | Q9NZB2     | Constitutive coactivator of PPAR-gamma-like protein 1                       | 89    |
| UQCRC2   | P22695     | Cytochrome b-c1 complex subunit 2, mitochondrial                            | 327   |
| ATP5F1   | P24539     | ATP synthase F(0) complex subunit B1, mitochondrial                         | 329   |
| MYOF     | Q9NZM1     | Myoferlin                                                                   | 87    |



|          |            |                                                                |       |
|----------|------------|----------------------------------------------------------------|-------|
| HSP90AB1 | P08238     | Heat shock protein HSP 90-beta                                 | 12700 |
| SLC3A2   | P08195-2   | Isoform 2 of 4F2 cell-surface antigen heavy chain              | 4476  |
| HSPA1B   | A0A0G2JIW1 | Heat shock 70 kDa protein 1B                                   | 6089  |
| NSFL1C   | F2Z2K0     | NSFL1 cofactor p47                                             | 39    |
| NONO     | Q15233     | Non-POU domain-containing octamer-binding protein              | 1354  |
| RPL6     | Q02878     | 60S ribosomal protein L6                                       | 2172  |
| HSPA4    | P34932     | Heat shock 70 kDa protein 4                                    | 1612  |
| IPO5     | O00410     | Importin-5                                                     | 1759  |
| VDAC2    | A0A0A0MR02 | Voltage-dependent anion-selective channel protein 2 (Fragment) | 692   |
| PFKP     | Q01813     | ATP-dependent 6-phosphofructokinase, platelet type             | 785   |
| RPL7A    | P62424     | 60S ribosomal protein L7a                                      | 1334  |
| PRPF4    | O43172     | U4/U6 small nuclear ribonucleoprotein Prp4                     | 44    |
| FTSJ3    | Q8IY81     | pre-rRNA processing protein FTSJ3                              | 32    |
| RACK1    | P63244     | Receptor of activated protein C kinase 1                       | 1166  |
| PSMB6    | P28072     | Proteasome subunit beta type-6                                 | 262   |
| RBMX     | P38159     | RNA-binding motif protein, X chromosome                        | 507   |
| RHOA     | P61586     | Transforming protein RhoA                                      | 133   |
| PICALM   | Q13492     | Phosphatidylinositol-binding clathrin assembly protein         | 88    |
| RUVBL1   | Q9Y265     | RuvB-like 1                                                    | 558   |
| DLD      | E9PEX6     | Dihydrolipoyl dehydrogenase                                    | 488   |
| EPHX1    | P07099     | Epoxide hydrolase 1                                            | 100   |
| TMPO     | P42167     | Lamina-associated polypeptide 2, isoforms beta/gamma           | 401   |
| PLA2G4A  | P47712     | Cytosolic phospholipase A2                                     | 128   |
| SRP54    | P61011     | Signal recognition particle 54 kDa protein                     | 80    |
| RAB21    | Q9UL25     | Ras-related protein Rab-21                                     | 232   |
| CORO1C   | B4E3S0     | Coronin                                                        | 121   |
| MRPS2    | Q9Y399     | 28S ribosomal protein S2, mitochondrial                        | 69    |
| EIF4G2   | H0Y3P2     | Eukaryotic translation initiation factor 4 gamma 2             | 320   |
| MDH2     | P40926     | Malate dehydrogenase, mitochondrial                            | 3139  |
| DHX15    | O43143     | Pre-mRNA-splicing factor ATP-dependent RNA helicase DHX15      | 274   |
| RPS3     | P23396     | 40S ribosomal protein S3                                       | 1937  |
| CD2AP    | Q9Y5K6     | CD2-associated protein                                         | 16    |
| TOP1     | P11387     | DNA topoisomerase 1                                            | 38    |
| VCP      | P55072     | Transitional endoplasmic reticulum ATPase                      | 4468  |
| TUFM     | P49411     | Elongation factor Tu, mitochondrial                            | 1371  |
| APEX1    | P27695     | DNA-(apurinic or apyrimidinic site) lyase                      | 329   |
| SMARCC2  | Q8TAQ2     | SWI/SNF complex subunit SMARCC2                                | 15    |
| NUMA1    | Q14980     | Nuclear mitotic apparatus protein 1                            | 259   |
| RBM8A    | Q9Y5S9     | RNA-binding protein 8A                                         | 180   |
| SNX1     | Q13596     | Sorting nexin-1                                                | 34    |
| EIF3L    | Q9Y262     | Eukaryotic translation initiation factor 3 subunit L           | 870   |
| MOGS     | Q13724     | Mannosyl-oligosaccharide glucosidase                           | 101   |
| DDI2     | H0YI90     | Protein DDI1 homolog 2 (Fragment)                              | 49    |
| SERBP1   | Q8NC51     | Plasminogen activator inhibitor 1 RNA-binding protein          | 1691  |
| RPS4X    | P62701     | 40S ribosomal protein S4, X isoform                            | 565   |
| INF2     | Q27J81     | Inverted formin-2                                              | 27    |
| LRRFIP1  | Q32MZ4     | Leucine-rich repeat flightless-interacting protein 1           | 338   |

|          |            |                                                           |       |
|----------|------------|-----------------------------------------------------------|-------|
| TOM1     | F8WB30     | Target of Myb protein 1                                   | 39    |
| XPO1     | O14980     | Exportin-1                                                | 1140  |
| FUBP3    | Q96I24     | Far upstream element-binding protein 3                    | 195   |
| NOSIP    | M0R3B2     | Nitric oxide synthase-interacting protein (Fragment)      | 33    |
| GSTM1    | P09488     | Glutathione S-transferase Mu 1                            | 272   |
| OLA1     | Q9NTK5     | Obg-like ATPase 1                                         | 582   |
| SF3B1    | O75533     | Splicing factor 3B subunit 1                              | 345   |
| NGDN     | Q8NEJ9     | Neuroguidin                                               | 95    |
| PSMB1    | P20618     | Proteasome subunit beta type-1                            | 250   |
| EIF3A    | Q14152     | Eukaryotic translation initiation factor 3 subunit A      | 787   |
| EPRS     | P07814     | Bifunctional glutamate/proline--tRNA ligase               | 669   |
| SNRPA1   | P09661     | U2 small nuclear ribonucleoprotein A'                     | 396   |
| RANGAP1  | P46060     | Ran GTPase-activating protein 1                           | 810   |
| TMED9    | Q9BVK6     | Transmembrane emp24 domain-containing protein 9           | 129   |
| FH       | P07954     | Fumarate hydratase, mitochondrial                         | 799   |
| LAMP1    | P11279     | Lysosome-associated membrane glycoprotein 1               | 155   |
| KIFC1    | Q9BW19     | Kinesin-like protein KIFC1                                | 28    |
| RBM12    | Q9NTZ6     | RNA-binding protein 12                                    | 34    |
| BIN1     | O00499     | Myc box-dependent-interacting protein 1                   | 65    |
| JPT2     | H3BMV3     | Jupiter microtubule-associated homolog 2 (Fragment)       | 110   |
| HSPA8    | P11142     | Heat shock cognate 71 kDa protein                         | 11264 |
| RPS18    | P62269     | 40S ribosomal protein S18                                 | 477   |
| ATP1A1   | P05023     | Sodium/potassium-transporting ATPase subunit alpha-1      | 354   |
| RAB1A    | P62820     | Ras-related protein Rab-1A                                | 280   |
| ATP6V1B2 | P21281     | V-type proton ATPase subunit B, brain isoform             | 19    |
| RPL36A   | H7BY91     | 60S ribosomal protein L36a                                | 29    |
| RPS24    | E7ETK0     | 40S ribosomal protein S24                                 | 451   |
| CPSF3    | Q9UKF6     | Cleavage and polyadenylation specificity factor subunit 3 | 16    |
| IPO8     | O15397     | Importin-8                                                | 74    |
| EIF4G1   | E7EX73     | Eukaryotic translation initiation factor 4 gamma 1        | 804   |
| RPLP0    | P05388     | 60S acidic ribosomal protein P0                           | 1152  |
| COPZ1    | P61923     | Coatamer subunit zeta-1                                   | 446   |
| RPS25    | P62851     | 40S ribosomal protein S25                                 | 246   |
| ASCC2    | Q9H1I8     | Activating signal cointegrator 1 complex subunit 2        | 19    |
| ILK      | A0A0A0MTH3 | Integrin-linked protein kinase                            | 167   |
| PUF60    | A0A0J9YYL3 | Poly(U)-binding-splicing factor PUF60 (Fragment)          | 211   |
| EBNA1BP2 | Q99848     | Probable rRNA-processing protein EBP2                     | 233   |
| GLUD1    | P00367     | Glutamate dehydrogenase 1, mitochondrial                  | 350   |
| ATP5C1   | P36542     | ATP synthase subunit gamma, mitochondrial                 | 147   |
| SUMO3    | A8MU27     | Small ubiquitin-related modifier 3                        | 309   |
| PA2G4    | Q9UQ80     | Proliferation-associated protein 2G4                      | 1525  |
| PSMA2    | P25787     | Proteasome subunit alpha type-2                           | 436   |
| TRAPPC3  | O43617     | Trafficking protein particle complex subunit 3            | 28    |
| RPSA     | P08865     | 40S ribosomal protein SA                                  | 1658  |
| WDR12    | Q9GZL7     | Ribosome biogenesis protein WDR12                         | 110   |
| MRPL49   | Q13405     | 39S ribosomal protein L49, mitochondrial                  | 138   |
| NCAPG    | Q9BPX3     | Condensin complex subunit 3                               | 74    |
| SRP14    | P37108     | Signal recognition particle 14 kDa protein                | 701   |

|           |            |                                                                  |       |
|-----------|------------|------------------------------------------------------------------|-------|
| HIST2H2AC | Q16777     | Histone H2A type 2-C                                             | 2460  |
| NOP56     | O00567     | Nucleolar protein 56                                             | 253   |
| EEF1G     | P26641     | Elongation factor 1-gamma                                        | 2956  |
| LUC7L3    | O95232     | Luc7-like protein 3                                              | 195   |
| RPS19     | P39019     | 40S ribosomal protein S19                                        | 283   |
| HIST1H4A  | P62805     | Histone H4                                                       | 3860  |
| RAB10     | P61026     | Ras-related protein Rab-10                                       | 165   |
| NFS1      | Q9Y697     | Cysteine desulfurase, mitochondrial                              | 28    |
| RPS23     | P62266     | 40S ribosomal protein S23                                        | 479   |
| TIMM44    | O43615     | Mitochondrial import inner membrane translocase subunit<br>TIM44 | 121   |
| APEH      | P13798     | Acylamino-acid-releasing enzyme                                  | 63    |
| EIF5B     | O60841     | Eukaryotic translation initiation factor 5B                      | 60    |
| CAST      | A0A0C4DGB5 | Calpastatin                                                      | 175   |
| CLNS1A    | E9PMI6     | Methylosome subunit pICln                                        | 15    |
| HSP90AA1  | P07900     | Heat shock protein HSP 90-alpha                                  | 13413 |
| RPL13     | P26373     | 60S ribosomal protein L13                                        | 1097  |
| TRIP13    | Q15645     | Pachytene checkpoint protein 2 homolog                           | 343   |
| XPNPEP3   | Q9NQH7     | Probable Xaa-Pro aminopeptidase 3                                | 76    |
| PSMB2     | P49721     | Proteasome subunit beta type-2                                   | 544   |
| SLC25A13  | Q9UJS0     | Calcium-binding mitochondrial carrier protein Aralar2            | 105   |
| H3F3A     | P84243     | Histone H3.3                                                     | 312   |
| PTBP1     | P26599     | Polypyrimidine tract-binding protein 1                           | 2251  |
| RPL29     | P47914     | 60S ribosomal protein L29                                        | 227   |
| MT-CO2    | P00403     | Cytochrome c oxidase subunit 2                                   | 291   |
| SEC62     | F8WCJ7     | Translocation protein SEC62                                      | 31    |
| ZMPSTE24  | O75844     | CAAX prenyl protease 1 homolog                                   | 30    |
| TCP1      | P17987     | T-complex protein 1 subunit alpha                                | 1530  |
| PSMB7     | Q99436     | Proteasome subunit beta type-7                                   | 240   |
| DDX5      | J3KTA4     | Probable ATP-dependent RNA helicase DDX5                         | 1239  |
| MTAP      | Q13126     | S-methyl-5'-thioadenosine phosphorylase                          | 407   |
| NCL       | P19338     | Nucleolin                                                        | 4352  |
| EIF4A1    | P60842     | Eukaryotic initiation factor 4A-I                                | 3542  |
| RPS11     | P62280     | 40S ribosomal protein S11                                        | 199   |
| JUP       | P14923     | Junction plakoglobin                                             | 401   |
| EEF1D     | P29692     | Elongation factor 1-delta                                        | 1875  |
| CDC37     | Q16543     | Hsp90 co-chaperone Cdc37                                         | 463   |
| CBR1      | P16152     | Carbonyl reductase [NADPH] 1                                     | 652   |
| NCAPH2    | E5RJN3     | Condensin-2 complex subunit H2 (Fragment)                        | 19    |
| BUD31     | P41223     | Protein BUD31 homolog                                            | 41    |
| HSP90AB4P | Q58FF6     | Putative heat shock protein HSP 90-beta 4                        | 1051  |
| IPO4      | Q8TEX9     | Importin-4                                                       | 48    |
| EIF3E     | P60228     | Eukaryotic translation initiation factor 3 subunit E             | 632   |
| ABCF1     | Q8NE71     | ATP-binding cassette sub-family F member 1                       | 455   |
| RPLP1     | P05386     | 60S acidic ribosomal protein P1                                  | 414   |
| GART      | P22102     | Trifunctional purine biosynthetic protein adenosine-3            | 388   |
| RPL31     | P62899     | 60S ribosomal protein L31                                        | 196   |
| RPL18     | J3QQ67     | 60S ribosomal protein L18 (Fragment)                             | 671   |

|          |            |                                                                           |      |
|----------|------------|---------------------------------------------------------------------------|------|
| POTEF    | A5A3E0     | POTE ankyrin domain family member F                                       | 4599 |
| P4HB     | P07237     | Protein disulfide-isomerase                                               | 2829 |
| HDLBP    | Q00341     | Vigilin                                                                   | 138  |
| NAP1L1   | H0YIV4     | Nucleosome assembly protein 1-like 1 (Fragment)                           | 1125 |
| TIAL1    | Q01085-2   | Isoform 2 of Nucleolysin TIAR                                             | 140  |
| PPP4C    | P60510     | Serine/threonine-protein phosphatase 4 catalytic subunit                  | 24   |
| RPL36    | Q9Y3U8     | 60S ribosomal protein L36                                                 | 94   |
| RPS17    | P08708     | 40S ribosomal protein S17                                                 | 568  |
| RTCB     | Q9Y3I0     | tRNA-splicing ligase RtcB homolog                                         | 143  |
| RFC4     | P35249     | Replication factor C subunit 4                                            | 56   |
| NCKAP1   | Q9Y2A7     | Nck-associated protein 1                                                  | 29   |
| ADSS     | P30520     | Adenylosuccinate synthetase isozyme 2                                     | 465  |
| LMNB1    | P20700     | Lamin-B1                                                                  | 1950 |
| COPS3    | Q9UNS2     | COP9 signalosome complex subunit 3                                        | 389  |
| NCBP1    | Q09161     | Nuclear cap-binding protein subunit 1                                     | 115  |
| DYNC1LI2 | O43237     | Cytoplasmic dynein 1 light intermediate chain 2                           | 28   |
| NTMT1    | Q9BV86     | N-terminal Xaa-Pro-Lys N-methyltransferase 1                              | 163  |
| TXNDC5   | Q8NBS9     | Thioredoxin domain-containing protein 5                                   | 158  |
| DDX24    | Q9GZR7     | ATP-dependent RNA helicase DDX24                                          | 57   |
| SNF8     | Q96H20     | Vacuolar-sorting protein SNF8                                             | 20   |
| PUS7     | Q96PZ0     | Pseudouridylate synthase 7 homolog                                        | 42   |
| KPNA6    | O60684     | Importin subunit alpha-7                                                  | 155  |
| SUB1     | P53999     | Activated RNA polymerase II transcriptional coactivator p15               | 377  |
| ALDH18A1 | P54886     | Delta-1-pyrroline-5-carboxylate synthase                                  | 293  |
| RPL23A   | P62750     | 60S ribosomal protein L23a                                                | 464  |
| ITGB1    | P05556     | Integrin beta-1                                                           | 399  |
| MATR3    | A8MXP9     | Matrin-3                                                                  | 1285 |
| HNRNPC   | B4DY08     | Heterogeneous nuclear ribonucleoproteins C1/C2                            | 1902 |
| CLTC     | A0A087WVQ6 | Clathrin heavy chain                                                      | 704  |
| ACADVL   | P49748     | Very long-chain specific acyl-CoA dehydrogenase, mitochondrial            | 413  |
| MAP4     | P27816     | Microtubule-associated protein 4                                          | 661  |
| DDX42    | Q86XP3     | ATP-dependent RNA helicase DDX42                                          | 41   |
| EIF1     | P41567     | Eukaryotic translation initiation factor 1                                | 215  |
| VN1R5    | Q7Z5H4     | Vomer nasal type-1 receptor 5                                             | 33   |
| MRT04    | Q9UKD2     | mRNA turnover protein 4 homolog                                           | 57   |
| HNRNPF   | P52597     | Heterogeneous nuclear ribonucleoprotein F                                 | 848  |
| ZNF326   | Q5BKZ1     | DBIRD complex subunit ZNF326                                              | 33   |
| EFHD2    | H0Y4Y4     | EF-hand domain-containing protein D2 (Fragment)                           | 37   |
| EIF4A3   | P38919     | Eukaryotic initiation factor 4A-III                                       | 761  |
| STIP1    | P31948     | Stress-induced-phosphoprotein 1                                           | 1822 |
| CLASP2   | E7EW49     | CLIP-associating protein 2                                                | 85   |
| OGDH     | E9PDF2     | 2-oxoglutarate dehydrogenase, mitochondrial                               | 306  |
| TBL1XR1  | Q9BZK7     | F-box-like/WD repeat-containing protein TBL1XR1                           | 74   |
| PPME1    | Q9Y570     | Protein phosphatase methylesterase 1                                      | 28   |
| AASDHPPT | Q9NRN7     | L-aminoadipate-semialdehyde dehydrogenase-phosphopantetheinyl transferase | 54   |
| PSMD5    | Q16401     | 26S proteasome non-ATPase regulatory subunit 5                            | 364  |

|         |            |                                                                                   |      |
|---------|------------|-----------------------------------------------------------------------------------|------|
| NEXN    | H7BXY5     | Nexilin (Fragment)                                                                | 14   |
| PPP2R1A | P30153     | Serine/threonine-protein phosphatase 2A 65 kDa regulatory subunit A alpha isoform | 1358 |
| NAP1L4  | Q99733     | Nucleosome assembly protein 1-like 4                                              | 856  |
| SURF4   | O15260     | Surfeit locus protein 4                                                           | 15   |
| SAMM50  | Q9Y512     | Sorting and assembly machinery component 50 homolog                               | 46   |
| MORF4L1 | B3KTM8     | Mortality factor 4-like protein 1                                                 | 33   |
| LETM1   | O95202     | Mitochondrial proton/calcium exchanger protein                                    | 120  |
| RRP15   | Q9Y3B9     | RRP15-like protein                                                                | 128  |
| BCAT1   | F5H2F2     | Branched-chain-amino-acid aminotransferase, cytosolic (Fragment)                  | 40   |
| ACOT9   | Q9Y305     | Acyl-coenzyme A thioesterase 9, mitochondrial                                     | 0    |
| EIF2S2  | P20042     | Eukaryotic translation initiation factor 2 subunit 2                              | 315  |
| RARS    | P54136     | Arginine--tRNA ligase, cytoplasmic                                                | 361  |
| PDIA3   | H7BZJ3     | Protein disulfide-isomerase A3 (Fragment)                                         | 560  |
| ARF3    | P61204     | ADP-ribosylation factor 3                                                         | 542  |
| HNRNPAB | Q99729-3   | Isoform 3 of Heterogeneous nuclear ribonucleoprotein A/B                          | 1032 |
| CSDE1   | O75534     | Cold shock domain-containing protein E1                                           | 104  |
| RBM39   | H0Y4X3     | RNA-binding protein 39 (Fragment)                                                 | 168  |
| PDCD6IP | Q8WUM4     | Programmed cell death 6-interacting protein                                       | 332  |
| PSMD1   | Q99460     | 26S proteasome non-ATPase regulatory subunit 1                                    | 224  |
| CPNE1   | B0QZ18     | Copine-1                                                                          | 369  |
| PABPC1  | A0A087WTT1 | Polyadenylate-binding protein                                                     | 1119 |
| YWHAQ   | P27348     | 14-3-3 protein theta                                                              | 2645 |
| RPL30   | A0A0C4DH44 | 60S ribosomal protein L30                                                         | 29   |
| MTA2    | O94776     | Metastasis-associated protein MTA2                                                | 221  |
| -       | H3BN98     | Uncharacterized protein (Fragment)                                                | 331  |
| CCDC43  | Q96MW1     | Coiled-coil domain-containing protein 43                                          | 24   |
| APMAP   | Q9HDC9     | Adipocyte plasma membrane-associated protein                                      | 170  |
| ACAD9   | Q9H845     | Acyl-CoA dehydrogenase family member 9, mitochondrial                             | 142  |
| GATAD2A | Q86YP4     | Transcriptional repressor p66-alpha                                               | 26   |
| RAB8A   | P61006     | Ras-related protein Rab-8A                                                        | 67   |
| RPS5    | M0R0R2     | 40S ribosomal protein S5                                                          | 507  |
| RPS9    | P46781     | 40S ribosomal protein S9                                                          | 263  |
| PABPC4  | Q13310-3   | Isoform 3 of Polyadenylate-binding protein 4                                      | 690  |
| GCSH    | A0A1W2PQV2 | Glycine cleavage system H protein, mitochondrial (Fragment)                       | 43   |
| DHX30   | H7BXY3     | Putative ATP-dependent RNA helicase DHX30                                         | 57   |
| PPM1G   | O15355     | Protein phosphatase 1G                                                            | 128  |
| RPL27A  | E9PLL6     | 60S ribosomal protein L27a                                                        | 126  |
| MCTS1   | Q9ULC4     | Malignant T-cell-amplified sequence 1                                             | 116  |
| IGF2BP3 | O00425     | Insulin-like growth factor 2 mRNA-binding protein 3                               | 558  |
| RPL5    | P46777     | 60S ribosomal protein L5                                                          | 652  |
| TRAP1   | Q12931     | Heat shock protein 75 kDa, mitochondrial                                          | 2285 |
| POLR2H  | C9JLU1     | DNA-directed RNA polymerases I, II, and III subunit RPABC3 (Fragment)             | 311  |
| PTGES3  | A0A087WYT3 | Prostaglandin E synthase 3                                                        | 246  |
| RPS26   | P62854     | 40S ribosomal protein S26                                                         | 377  |
| VARS    | P26640     | Valine--tRNA ligase                                                               | 582  |

|          |            |                                                                  |      |
|----------|------------|------------------------------------------------------------------|------|
| BSG      | A0A087WUV8 | Basigin                                                          | 197  |
| HMGB1    | Q5T7C4     | High mobility group protein B1                                   | 685  |
| PHGDH    | O43175     | D-3-phosphoglycerate dehydrogenase                               | 1711 |
| PRPF31   | E7EVX8     | U4/U6 small nuclear ribonucleoprotein Prp31                      | 50   |
| DPYSL3   | Q14195     | Dihydropyrimidinase-related protein 3                            | 386  |
| PDCL3    | Q9H2J4     | Phosducin-like protein 3                                         | 26   |
| SLIRP    | G3V2S9     | SRA stem-loop-interacting RNA-binding protein, mitochondrial     | 16   |
| RPL9     | P32969     | 60S ribosomal protein L9                                         | 479  |
| EEF2     | P13639     | Elongation factor 2                                              | 3753 |
| STK25    | O00506     | Serine/threonine-protein kinase 25                               | 120  |
| RPLP2    | P05387     | 60S acidic ribosomal protein P2                                  | 430  |
| PPP1CA   | P62136     | Serine/threonine-protein phosphatase PP1-alpha catalytic subunit | 571  |
| SCRN1    | Q12765     | Secernin-1                                                       | 39   |
| CSE1L    | P55060     | Exportin-2                                                       | 2105 |
| SKIV2L2  | P42285     | Superkiller viralicidic activity 2-like 2                        | 308  |
| SNRNP70  | P08621     | U1 small nuclear ribonucleoprotein 70 kDa                        | 240  |
| PABPN1   | Q86U42     | Polyadenylate-binding protein 2                                  | 140  |
| ETF1     | P62495     | Eukaryotic peptide chain release factor subunit 1                | 795  |
| SLC25A5  | P05141     | ADP/ATP translocase 2                                            | 520  |
| SERPINH1 | P50454     | Serpin H1                                                        | 2580 |
| DDX17    | A0A1W2PQ51 | Probable ATP-dependent RNA helicase DDX17                        | 1915 |
| RPS13    | P62277     | 40S ribosomal protein S13                                        | 378  |
| RPL7     | P18124     | 60S ribosomal protein L7                                         | 716  |
| ATAD3A   | Q9NVI7     | ATPase family AAA domain-containing protein 3A                   | 422  |
| FAF1     | Q9UNN5     | FAS-associated factor 1                                          | 34   |
| DNMT1    | P26358     | DNA (cytosine-5)-methyltransferase 1                             | 15   |
| EIF4B    | E7EX17     | Eukaryotic translation initiation factor 4B                      | 325  |
| KARS     | Q15046     | Lysine--tRNA ligase                                              | 556  |
| RPS16    | P62249     | 40S ribosomal protein S16                                        | 622  |
| LMAN1    | P49257     | Protein ERGIC-53                                                 | 0    |
| RPL13A   | P40429     | 60S ribosomal protein L13a                                       | 737  |
| ELOB     | Q15370     | Elongin-B                                                        | 207  |
| MFF      | Q9GZY8-2   | Isoform 2 of Mitochondrial fission factor                        | 63   |
| BROX     | Q5VW33     | BRO1 domain-containing protein BROX (Fragment)                   | 21   |
| DYNC1I2  | Q13409     | Cytoplasmic dynein 1 intermediate chain 2                        | 355  |
| CTBP2    | P56545     | C-terminal-binding protein 2                                     | 46   |
| SH3BGRL  | O75368     | SH3 domain-binding glutamic acid-rich-like protein               | 31   |
| IMPDH2   | H0Y4R1     | Inosine-5'-monophosphate dehydrogenase 2 (Fragment)              | 896  |
| UGDH     | E7ETF4     | UDP-glucose 6-dehydrogenase (Fragment)                           | 219  |
| RUVBL2   | Q9Y230     | RuvB-like 2                                                      | 477  |
| PSMD14   | O00487     | 26S proteasome non-ATPase regulatory subunit 14                  | 148  |
| PNP      | P00491     | Purine nucleoside phosphorylase                                  | 1298 |
| UBA1     | P22314     | Ubiquitin-like modifier-activating enzyme 1                      | 4322 |
| PRKAR2A  | P13861     | cAMP-dependent protein kinase type II-alpha regulatory subunit   | 107  |
| RAP1B    | P61224     | Ras-related protein Rap-1b                                       | 234  |
| HMGB2    | P26583     | High mobility group protein B2                                   | 21   |

|                    |            |                                                                               |      |
|--------------------|------------|-------------------------------------------------------------------------------|------|
| MRPL47             | Q9HD33     | 39S ribosomal protein L47, mitochondrial                                      | 23   |
| TMEM189-<br>UBE2V1 | I3L0A0     | HCG2044781                                                                    | 339  |
| RBM14              | Q96PK6     | RNA-binding protein 14                                                        | 115  |
| PMPCA              | Q10713     | Mitochondrial-processing peptidase subunit alpha                              | 92   |
| UBAP2              | A2A305     | Ubiquitin-associated protein 2 (Fragment)                                     | 30   |
| ACAA2              | P42765     | 3-ketoacyl-CoA thiolase, mitochondrial                                        | 839  |
| MRM3               | I3L0T6     | rRNA methyltransferase 3, mitochondrial                                       | 41   |
| MTHFD1L            | A0A087WVM4 | Monofunctional C1-tetrahydrofolate synthase, mitochondrial                    | 115  |
| DSG2               | Q14126     | Desmoglein-2                                                                  | 76   |
| PDIA4              | P13667     | Protein disulfide-isomerase A4                                                | 622  |
| ATP5H              | O75947     | ATP synthase subunit d, mitochondrial                                         | 236  |
| COPG1              | Q9Y678     | Coatmer subunit gamma-1                                                       | 240  |
| BOLA2              | Q9H3K6     | BolA-like protein 2                                                           | 20   |
| TSMF               | P43897     | Elongation factor Ts, mitochondrial                                           | 136  |
| NUP93              | Q8N1F7     | Nuclear pore complex protein Nup93                                            | 191  |
| HBA1               | P69905     | Hemoglobin subunit alpha                                                      | 225  |
| PDLIM7             | Q9NR12     | PDZ and LIM domain protein 7                                                  | 139  |
| POLDIP3            | Q9BY77     | Polymerase delta-interacting protein 3                                        | 48   |
| HSPA5              | P11021     | 78 kDa glucose-regulated protein                                              | 7099 |
| SART1              | O43290     | U4/U6.U5 tri-snRNP-associated protein 1                                       | 107  |
| CTNNB1             | P35222     | Catenin beta-1                                                                | 290  |
| TARDBP             | Q13148     | TAR DNA-binding protein 43                                                    | 923  |
| RPS20              | P60866     | 40S ribosomal protein S20                                                     | 297  |
| MOB1A              | Q9H8S9     | MOB kinase activator 1A                                                       | 33   |
| HADHB              | F5GZQ3     | Trifunctional enzyme subunit beta, mitochondrial                              | 95   |
| IKBIP              | Q70UQ0-4   | Isoform 4 of Inhibitor of nuclear factor kappa-B kinase-interacting protein   | 14   |
| SNRPD3             | P62318     | Small nuclear ribonucleoprotein Sm D3                                         | 73   |
| THG1L              | E5RIQ8     | Probable tRNA(His) guanylyltransferase                                        | 23   |
| RPL35A             | P18077     | 60S ribosomal protein L35a                                                    | 49   |
| RPS6               | P62753     | 40S ribosomal protein S6                                                      | 1078 |
| RAD23A             | P54725     | UV excision repair protein RAD23 homolog A                                    | 59   |
| PRDX2              | P32119     | Peroxisredoxin-2                                                              | 906  |
| MRPS27             | D6RH20     | 28S ribosomal protein S27, mitochondrial (Fragment)                           | 37   |
| SRP9               | P49458     | Signal recognition particle 9 kDa protein                                     | 56   |
| TOR1AIP1           | A0A0A0MSK5 | Torsin-1A-interacting protein 1                                               | 204  |
| PMM2               | H3BV55     | Phosphomannomutase                                                            | 67   |
| UQCRC1             | P31930     | Cytochrome b-c1 complex subunit 1, mitochondrial                              | 71   |
| DAP3               | P51398     | 28S ribosomal protein S29, mitochondrial                                      | 37   |
| ABCE1              | P61221     | ATP-binding cassette sub-family E member 1                                    | 81   |
| SUGP2              | M0R3F6     | SURP and G-patch domain-containing protein 2                                  | 0    |
| ETFB               | P38117     | Electron transfer flavoprotein subunit beta                                   | 173  |
| DDOST              | P39656     | Dolichyl-diphosphooligosaccharide--protein glycosyltransferase 48 kDa subunit | 256  |
| NQO1               | B4DLR8     | NAD(P)H dehydrogenase [quinone] 1                                             | 444  |
| KHSRP              | Q92945     | Far upstream element-binding protein 2                                        | 535  |
| PXN                | F5GZ78     | Paxillin                                                                      | 28   |
| EBP                | Q15125     | 3-beta-hydroxysteroid-Delta(8),Delta(7)-isomerase                             | 36   |

|         |          |                                                                          |       |
|---------|----------|--------------------------------------------------------------------------|-------|
| SNRPF   | P62306   | Small nuclear ribonucleoprotein F                                        | 38    |
| NSUN2   | Q08J23   | tRNA (cytosine(34)-C(5))-methyltransferase                               | 1049  |
| RPL8    | P62917   | 60S ribosomal protein L8                                                 | 439   |
| RTN3    | O95197   | Reticulon-3                                                              | 77    |
| CTTN    | Q14247   | Src substrate cortactin                                                  | 690   |
| RPS2    | P15880   | 40S ribosomal protein S2                                                 | 891   |
| PFDN5   | Q99471   | Prefoldin subunit 5                                                      | 177   |
| RPN1    | P04843   | Dolichyl-diphosphooligosaccharide--protein glycosyltransferase subunit 1 | 867   |
| SAP18   | H7BZW6   | Histone deacetylase complex subunit SAP18 (Fragment)                     | 45    |
| PKM     | P14618   | Pyruvate kinase PKM                                                      | 10315 |
| TAMM41  | B4E101   | Phosphatidate cytidyltransferase, mitochondrial                          | 43    |
| POP1    | Q99575   | Ribonucleases P/MRP protein subunit POP1                                 | 24    |
| PGP     | A6NDG6   | Glycerol-3-phosphate phosphatase                                         | 23    |
| TBRG4   | Q969Z0   | Protein TBRG4                                                            | 0     |
| TARS    | P26639   | Threonine--tRNA ligase, cytoplasmic                                      | 2758  |
| NMT1    | P30419   | Glycylpeptide N-tetradecanoyltransferase 1                               | 181   |
| MAP2K2  | P36507   | Dual specificity mitogen-activated protein kinase kinase 2               | 33    |
| CNP     | P09543   | 2',3'-cyclic-nucleotide 3'-phosphodiesterase                             | 25    |
| LARS    | Q9P2J5   | Leucine--tRNA ligase, cytoplasmic                                        | 762   |
| TIPRL   | O75663   | TIP41-like protein                                                       | 15    |
| MYBBP1A | Q9BQG0   | Myb-binding protein 1A                                                   | 156   |
| MYO1C   | O00159   | Unconventional myosin-Ic                                                 | 74    |
| KIF5B   | P33176   | Kinesin-1 heavy chain                                                    | 517   |
| FKBP4   | Q02790   | Peptidyl-prolyl cis-trans isomerase FKBP4                                | 1324  |
| ATP5B   | P06576   | ATP synthase subunit beta, mitochondrial                                 | 6428  |
| EIF3B   | P55884   | Eukaryotic translation initiation factor 3 subunit B                     | 420   |
| CAVIN1  | Q6NZI2   | Caveolae-associated protein 1                                            | 674   |
| DDX27   | Q96GQ7   | Probable ATP-dependent RNA helicase DDX27                                | 100   |
| PIR     | O00625   | Pirin                                                                    | 370   |
| LGMN    | G3V4E4   | Legumain                                                                 | 32    |
| RTRAF   | Q9Y224   | RNA transcription, translation and transport factor protein              | 375   |
| SYNCRIP | O60506-3 | Isoform 3 of Heterogeneous nuclear ribonucleoprotein Q                   | 1849  |
| IDH3A   | H0YL72   | Isocitrate dehydrogenase [NAD] subunit alpha, mitochondrial              | 219   |
| ARF4    | P18085   | ADP-ribosylation factor 4                                                | 610   |
| EDF1    | O60869   | Endothelial differentiation-related factor 1                             | 307   |
| SNRPE   | P62304   | Small nuclear ribonucleoprotein E                                        | 16    |
| MAT2B   | Q9NZL9   | Methionine adenosyltransferase 2 subunit beta                            | 33    |
| ATP5A1  | P25705   | ATP synthase subunit alpha, mitochondrial                                | 3276  |
| LUC7L2  | Q9Y383   | Putative RNA-binding protein Luc7-like 2                                 | 278   |
| AHNAK2  | Q8IVF2   | Protein AHNAK2                                                           | 29    |
| ITGAV   | P06756   | Integrin alpha-V                                                         | 26    |
| TRMT112 | F5GYQ2   | Multifunctional methyltransferase subunit TRM112-like protein            | 131   |
| SLC7A5  | Q01650   | Large neutral amino acids transporter small subunit 1                    | 435   |
| SUGT1   | Q9Y2Z0   | Protein SGT1 homolog                                                     | 331   |
| HSP90B1 | P14625   | Endoplasmin                                                              | 3874  |
| PSPC1   | X6RDA4   | Paraspeckle component 1 (Fragment)                                       | 35    |



|           |            |                                                                          |      |
|-----------|------------|--------------------------------------------------------------------------|------|
| AP1B1     | Q10567     | AP-1 complex subunit beta-1                                              | 282  |
| RPS7      | P62081     | 40S ribosomal protein S7                                                 | 813  |
| UBE2N     | P61088     | Ubiquitin-conjugating enzyme E2 N                                        | 283  |
| PSMD7     | P51665     | 26S proteasome non-ATPase regulatory subunit 7                           | 44   |
| TNPO1     | Q92973-2   | Isoform 2 of Transportin-1                                               | 829  |
| SEC22B    | O75396     | Vesicle-trafficking protein SEC22b                                       | 622  |
| -         | U3KPZ7     | Uncharacterized protein                                                  | 36   |
| ME1       | P48163     | NADP-dependent malic enzyme                                              | 280  |
| ACTR3     | P61158     | Actin-related protein 3                                                  | 564  |
| CRTAP     | O75718     | Cartilage-associated protein                                             | 88   |
| PNPT1     | Q8TCS8     | Polyribonucleotide nucleotidyltransferase 1, mitochondrial               | 36   |
| EIF3C     | Q99613     | Eukaryotic translation initiation factor 3 subunit C                     | 283  |
| EIF2S1    | P05198     | Eukaryotic translation initiation factor 2 subunit 1                     | 181  |
| SF3A2     | Q15428     | Splicing factor 3A subunit 2                                             | 44   |
| FIS1      | Q9Y3D6     | Mitochondrial fission 1 protein                                          | 369  |
| SPTBN1    | Q01082     | Spectrin beta chain, non-erythrocytic 1                                  | 537  |
| DARS      | P14868     | Aspartate--tRNA ligase, cytoplasmic                                      | 128  |
| PYGL      | P06737     | Glycogen phosphorylase, liver form                                       | 321  |
| BLVRB     | P30043     | Flavin reductase (NADPH)                                                 | 57   |
| USP7      | Q93009     | Ubiquitin carboxyl-terminal hydrolase 7                                  | 44   |
| KRT7      | P08729     | Keratin, type II cytoskeletal 7                                          | 5761 |
| EIF3G     | O75821     | Eukaryotic translation initiation factor 3 subunit G                     | 321  |
| ERGIC1    | Q969X5     | Endoplasmic reticulum-Golgi intermediate compartment protein 1           | 117  |
| RPL10A    | P62906     | 60S ribosomal protein L10a                                               | 344  |
| HNRNPM    | A0A087X0X3 | Heterogeneous nuclear ribonucleoprotein M                                | 1736 |
| TSTA3     | Q13630     | GDP-L-fucose synthase                                                    | 117  |
| GDI1      | P31150     | Rab GDP dissociation inhibitor alpha                                     | 409  |
| MCM2      | P49736     | DNA replication licensing factor MCM2                                    | 532  |
| DNAJC8    | O75937     | DnaJ homolog subfamily C member 8                                        | 22   |
| FXR1      | B4DXZ6     | Fragile X mental retardation syndrome-related protein 1                  | 82   |
| RAN       | B5MDF5     | GTP-binding nuclear protein Ran                                          | 909  |
| CAND1     | Q86VP6     | Cullin-associated NEDD8-dissociated protein 1                            | 542  |
| BUB3      | O43684     | Mitotic checkpoint protein BUB3                                          | 261  |
| EIF6      | P56537     | Eukaryotic translation initiation factor 6                               | 153  |
| UBQLN2    | Q9UHD9     | Ubiquilin-2                                                              | 245  |
| SSRP1     | Q08945     | FACT complex subunit SSRP1                                               | 638  |
| IQGAP1    | P46940     | Ras GTPase-activating-like protein IQGAP1                                | 1996 |
| EIF3H     | A0A087WZK9 | Eukaryotic translation initiation factor 3 subunit H                     | 103  |
| EIF3I     | Q13347     | Eukaryotic translation initiation factor 3 subunit I                     | 410  |
| RPL24     | P83731     | 60S ribosomal protein L24                                                | 444  |
| COTL1     | Q14019     | Coactosin-like protein                                                   | 87   |
| MCM3      | P25205     | DNA replication licensing factor MCM3                                    | 1255 |
| NME1-NME2 | Q32Q12     | Nucleoside diphosphate kinase                                            | 2262 |
| PGAM1     | P18669     | Phosphoglycerate mutase 1                                                | 1272 |
| RAB32     | Q13637     | Ras-related protein Rab-32                                               | 74   |
| EMC7      | H0YDX2     | ER membrane protein complex subunit 7 (Fragment)                         | 34   |
| ACADM     | Q5T4U5     | Acyl-Coenzyme A dehydrogenase, C-4 to C-12 straight chain, isoform CRA_a | 16   |

|              |            |                                                                                        |     |
|--------------|------------|----------------------------------------------------------------------------------------|-----|
| CDC123       | X6RKY7     | Cell division cycle protein 123 homolog (Fragment)                                     | 77  |
| CDK9         | P50750     | Cyclin-dependent kinase 9                                                              | 34  |
| HEATR1       | Q5T3Q7     | HEAT repeat-containing protein 1                                                       | 32  |
| HK2          | E9PB90     | Hexokinase-2                                                                           | 42  |
| SAR1A        | Q9NR31     | GTP-binding protein SAR1a                                                              | 36  |
| COL4A2       | P08572     | Collagen alpha-2(IV) chain                                                             | 18  |
| PTCD3        | Q96EY7     | Pentatricopeptide repeat domain-containing protein 3,<br>mitochondrial                 | 26  |
| FKBP2        | P26885     | Peptidyl-prolyl cis-trans isomerase FKBP2                                              | 0   |
| SNX6         | G3V2U1     | Sorting nexin-6                                                                        | 0   |
| TUBB6        | K7EK43     | Tubulin beta-6 chain (Fragment)                                                        | 93  |
| RBM25        | E9PQU5     | RNA-binding protein 25 (Fragment)                                                      | 38  |
| NDRG1        | E5RJY1     | Protein NDRG1                                                                          | 24  |
| CLIC3        | O95833     | Chloride intracellular channel protein 3                                               | 25  |
| TEX10        | A0A0A0MSR3 | Testis-expressed protein 10 (Fragment)                                                 | 0   |
| ORC5         | O43913     | Origin recognition complex subunit 5                                                   | 14  |
| FHL3         | Q13643     | Four and a half LIM domains protein 3                                                  | 30  |
| ADNP         | Q9H2P0     | Activity-dependent neuroprotector homeobox protein                                     | 39  |
| LARP4        | Q71RC2     | La-related protein 4                                                                   | 0   |
| NAA50        | C9J5D1     | N-alpha-acetyltransferase 50                                                           | 51  |
| PWP1         | B4DJV5     | Periodic tryptophan protein 1 homolog                                                  | 14  |
| LOC102724023 | A0A0B4J2D5 | Uncharacterized protein                                                                | 18  |
| ABCF2        | Q9UG63     | ATP-binding cassette sub-family F member 2                                             | 26  |
| EIF2B3       | Q9NR50     | Translation initiation factor eIF-2B subunit gamma                                     | 0   |
| MFAP1        | P55081     | Microfibrillar-associated protein 1                                                    | 21  |
| MRPL39       | C9JG87     | 39S ribosomal protein L39, mitochondrial (Fragment)                                    | 34  |
| MED22        | E7EN96     | Mediator of RNA polymerase II transcription subunit 22<br>(Fragment)                   | 0   |
| SAMHD1       | Q9Y3Z3     | Deoxynucleoside triphosphate triphosphohydrolase<br>SAMHD1                             | 21  |
| SPART        | Q8N0X7     | Spartin                                                                                | 28  |
| RPN2         | F2Z3K5     | Dolichyl-diphosphooligosaccharide--protein<br>glycosyltransferase subunit 2 (Fragment) | 25  |
| DUSP3        | P51452     | Dual specificity protein phosphatase 3                                                 | 59  |
| AP3B1        | O00203     | AP-3 complex subunit beta-1                                                            | 19  |
| FLYWCH2      | Q96CP2     | FLYWCH family member 2                                                                 | 31  |
| DAB2         | P98082     | Disabled homolog 2                                                                     | 37  |
| SREK1        | Q8WXA9     | Splicing regulatory glutamine/lysine-rich protein 1                                    | 37  |
| DDAH1        | O94760     | N(G),N(G)-dimethylarginine dimethylaminohydrolase 1                                    | 39  |
| PRRC2A       | P48634     | Protein PRRC2A                                                                         | 43  |
| CCDC124      | Q96CT7     | Coiled-coil domain-containing protein 124                                              | 30  |
| RPRD1B       | Q9NQG5     | Regulation of nuclear pre-mRNA domain-containing protein<br>1B                         | 123 |
| A2M          | P01023     | Alpha-2-macroglobulin                                                                  | 0   |
| COL14A1      | Q05707     | Collagen alpha-1(XIV) chain                                                            | 85  |
| APOB         | P04114     | Apolipoprotein B-100                                                                   | 149 |
| KRT5         | P13647     | Keratin, type II cytoskeletal 5                                                        | 544 |
| NOP9         | Q86U38     | Nucleolar protein 9                                                                    | 26  |
| TMSB10       | P63313     | Thymosin beta-10                                                                       | 25  |
| LTF          | E7EQB2     | Lactotransferrin (Fragment)                                                            | 28  |

|           |        |                                                                                    |      |
|-----------|--------|------------------------------------------------------------------------------------|------|
| DHX8      | F5H658 | ATP-dependent RNA helicase DHX8                                                    | 19   |
| NOP14     | P78316 | Nucleolar protein 14                                                               | 15   |
| RPAP3     | Q9H6T3 | RNA polymerase II-associated protein 3                                             | 23   |
| PUM3      | Q15397 | Pumilio homolog 3                                                                  | 62   |
| FAM98B    | Q52LJ0 | Protein FAM98B                                                                     | 217  |
| AUP1      | Q9Y679 | Ancient ubiquitous protein 1                                                       | 25   |
| TDP2      | O95551 | Tyrosyl-DNA phosphodiesterase 2                                                    | 28   |
| PIN4      | J3KMW3 | Peptidyl-prolyl cis-trans isomerase NIMA-interacting 4                             | 18   |
| LEO1      | Q8WVC0 | RNA polymerase-associated protein LEO1                                             | 15   |
| TNFAIP8   | O95379 | Tumor necrosis factor alpha-induced protein 8                                      | 19   |
| IST1      | J3KR23 | IST1 homolog (Fragment)                                                            | 30   |
| ITIH2     | P19823 | Inter-alpha-trypsin inhibitor heavy chain H2                                       | 28   |
| XPO7      | E7ESC6 | Exportin-7                                                                         | 25   |
| PUS1      | G8JLB3 | tRNA pseudouridine synthase (Fragment)                                             | 38   |
| HBD       | E9PFT6 | Hemoglobin subunit delta                                                           | 41   |
| ZGPAT     | Q8N5A5 | Zinc finger CCCH-type with G patch domain-containing protein                       | 25   |
| AK3       | Q9UIJ7 | GTP:AMP phosphotransferase AK3, mitochondrial                                      | 19   |
| CSTF3     | Q12996 | Cleavage stimulation factor subunit 3                                              | 64   |
| DIABLO    | Q9NR28 | Diablo homolog, mitochondrial                                                      | 0    |
| PDE3A     | Q14432 | cGMP-inhibited 3',5'-cyclic phosphodiesterase A                                    | 18   |
| EIF4G3    | O43432 | Eukaryotic translation initiation factor 4 gamma 3                                 | 98   |
| EHD4      | Q9H223 | EH domain-containing protein 4                                                     | 39   |
| EIPR1     | A8MUM1 | EARP-interacting protein                                                           | 14   |
| CPNE8     | Q86YQ8 | Copine-8                                                                           | 99   |
| PCYT2     | I3L1R7 | Ethanolamine-phosphate cytidyltransferase                                          | 37   |
| HSD17B12  | Q53GQ0 | Very-long-chain 3-oxoacyl-CoA reductase                                            | 14   |
| UBE2S     | Q16763 | Ubiquitin-conjugating enzyme E2 S                                                  | 37   |
| DDX23     | Q9BUQ8 | Probable ATP-dependent RNA helicase DDX23                                          | 18   |
| CDC16     | Q13042 | Cell division cycle protein 16 homolog                                             | 16   |
| FLG2      | Q5D862 | Filaggrin-2                                                                        | 24   |
| AP1M1     | K7EJL1 | AP-1 complex subunit mu-1                                                          | 0    |
| HRNR      | Q86YZ3 | Hornerin                                                                           | 31   |
| CD2BP2    | O95400 | CD2 antigen cytoplasmic tail-binding protein 2                                     | 14   |
| CWC22     | B7WP74 | Pre-mRNA-splicing factor CWC22 homolog (Fragment)                                  | 44   |
| STXBP1    | P61764 | Syntaxin-binding protein 1                                                         | 0    |
| MTHFD2    | B9A062 | Bifunctional methylenetetrahydrofolate dehydrogenase/cyclohydrolase, mitochondrial | 28   |
| SUN1      | H0Y742 | SUN domain-containing protein 1 (Fragment)                                         | 46   |
| USP39     | Q53GS9 | U4/U6.U5 tri-snRNP-associated protein 2                                            | 31   |
| GARS      | P41250 | Glycine--tRNA ligase                                                               | 966  |
| CBS       | P35520 | Cystathionine beta-synthase                                                        | 96   |
| HNRNPA2B1 | P22626 | Heterogeneous nuclear ribonucleoproteins A2/B1                                     | 3150 |
| PPP2R2A   | P63151 | Serine/threonine-protein phosphatase 2A 55 kDa regulatory subunit B alpha isoform  | 126  |
| ISY1      | Q9ULR0 | Pre-mRNA-splicing factor ISY1 homolog                                              | 42   |
| GSTP1     | P09211 | Glutathione S-transferase P                                                        | 4196 |
| RAE1      | E9PQ57 | mRNA export factor                                                                 | 34   |
| MCM6      | Q14566 | DNA replication licensing factor MCM6                                              | 558  |

|          |            |                                                                                 |      |
|----------|------------|---------------------------------------------------------------------------------|------|
| DDX19A   | H3BTB3     | ATP-dependent RNA helicase DDX19A                                               | 142  |
| NUDC     | Q9Y266     | Nuclear migration protein nudC                                                  | 830  |
| NUCB1    | Q02818     | Nucleobindin-1                                                                  | 110  |
| FTH1     | P02794     | Ferritin heavy chain                                                            | 32   |
| SF3A1    | Q15459     | Splicing factor 3A subunit 1                                                    | 294  |
| CPT1A    | P50416     | Carnitine O-palmitoyltransferase 1, liver isoform                               | 68   |
| PELO     | Q9BRX2     | Protein pelota homolog                                                          | 25   |
| RPS27L   | Q71UM5     | 40S ribosomal protein S27-like                                                  | 125  |
| SNX3     | O60493     | Sorting nexin-3                                                                 | 134  |
| ERAL1    | O75616     | GTPase Era, mitochondrial                                                       | 113  |
| PYCR1    | E2QRB3     | Pyrroline-5-carboxylate reductase 1, isoform CRA_c                              | 32   |
| TPD52L2  | O43399     | Tumor protein D54                                                               | 1078 |
| SEC11A   | H0YNX5     | Signal peptidase complex catalytic subunit SEC11<br>(Fragment)                  | 20   |
| HINT1    | D6RE99     | Histidine triad nucleotide-binding protein 1                                    | 62   |
| HTATSF1  | O43719     | HIV Tat-specific factor 1                                                       | 19   |
| UBE2Z    | Q9H832     | Ubiquitin-conjugating enzyme E2 Z                                               | 31   |
| HNRNPR   | O43390     | Heterogeneous nuclear ribonucleoprotein R                                       | 933  |
| H1FX     | Q92522     | Histone H1x                                                                     | 165  |
| ARHGDI1  | P52565     | Rho GDP-dissociation inhibitor 1                                                | 266  |
| SH2D4A   | H0YAT1     | SH2 domain-containing protein 4A (Fragment)                                     | 15   |
| HNRNPK   | P61978     | Heterogeneous nuclear ribonucleoprotein K                                       | 1870 |
| GLOD4    | F6TLX2     | Glyoxalase domain-containing protein 4                                          | 93   |
| SLC25A12 | O75746     | Calcium-binding mitochondrial carrier protein Aralar1                           | 41   |
| PRDX5    | P30044     | Peroxiredoxin-5, mitochondrial                                                  | 679  |
| GRB2     | P62993     | Growth factor receptor-bound protein 2                                          | 19   |
| PGAM5    | F5GXG4     | Serine/threonine-protein phosphatase PGAM5,<br>mitochondrial                    | 34   |
| SMC4     | Q9NTJ3     | Structural maintenance of chromosomes protein 4                                 | 143  |
| RPL26    | P61254     | 60S ribosomal protein L26                                                       | 161  |
| TUBA4B   | Q9H853     | Putative tubulin-like protein alpha-4B                                          | 2002 |
| LSM14A   | A0A140TA76 | Protein LSM14 homolog A (Fragment)                                              | 24   |
| CS       | O75390     | Citrate synthase, mitochondrial                                                 | 532  |
| SLC25A3  | F8VVM2     | Phosphate carrier protein, mitochondrial                                        | 166  |
| PSMB4    | P28070     | Proteasome subunit beta type-4                                                  | 631  |
| SAE1     | Q9UBE0     | SUMO-activating enzyme subunit 1                                                | 98   |
| TSR1     | Q2NL82     | Pre-rRNA-processing protein TSR1 homolog                                        | 18   |
| TRIM25   | Q14258     | E3 ubiquitin/ISG15 ligase TRIM25                                                | 18   |
| GEMIN5   | Q8TEQ6     | Gem-associated protein 5                                                        | 24   |
| RAB6A    | P20340     | Ras-related protein Rab-6A                                                      | 51   |
| GPS1     | Q13098     | COP9 signalosome complex subunit 1                                              | 99   |
| THRAP3   | Q9Y2W1     | Thyroid hormone receptor-associated protein 3                                   | 222  |
| SARNP    | P82979     | SAP domain-containing ribonucleoprotein                                         | 296  |
| GTF3C5   | Q5T7U1     | General transcription factor 3C polypeptide 5                                   | 57   |
| PACSIN2  | A0A0U1RR22 | Protein kinase C and casein kinase substrate in neurons<br>protein 2 (Fragment) | 56   |
| EIF2B2   | H0YJJ8     | Translation initiation factor eIF-2B subunit beta (Fragment)                    | 17   |
| ARL1     | F8VYN9     | ADP-ribosylation factor-like protein 1                                          | 35   |
| TPM3     | P06753-2   | Isoform 2 of Tropomyosin alpha-3 chain                                          | 2039 |

|                |            |                                                               |      |
|----------------|------------|---------------------------------------------------------------|------|
| PCNP           | Q8WW12     | PEST proteolytic signal-containing nuclear protein            | 75   |
| HNRNPU         | Q00839     | Heterogeneous nuclear ribonucleoprotein U                     | 2958 |
| MTPN           | P58546     | Myotrophin                                                    | 287  |
| AIFM1          | Q95831     | Apoptosis-inducing factor 1, mitochondrial                    | 341  |
| DNM3           | E5RIK2     | Dynamin-3 (Fragment)                                          | 27   |
| ADSL           | A0A1B0GTJ7 | Adenylosuccinate lyase                                        | 436  |
| OTUB1          | J3KR44     | Ubiquitin thioesterase                                        | 553  |
| PRDX1          | Q06830     | Peroxiredoxin-1                                               | 2316 |
| PARP1          | P09874     | Poly [ADP-ribose] polymerase 1                                | 1022 |
| RRBP1          | Q9P2E9     | Ribosome-binding protein 1                                    | 97   |
| EIF5A          | I3L397     | Eukaryotic translation initiation factor 5A (Fragment)        | 1882 |
| CDK2           | P24941     | Cyclin-dependent kinase 2                                     | 64   |
| FARSB          | Q9NSD9     | Phenylalanine--tRNA ligase beta subunit                       | 131  |
| RBM4           | Q9BWF3     | RNA-binding protein 4                                         | 204  |
| THOP1          | P52888     | Thimet oligopeptidase                                         | 91   |
| HADHA          | P40939     | Trifunctional enzyme subunit alpha, mitochondrial             | 476  |
| FEN1           | P39748     | Flap endonuclease 1                                           | 513  |
| PPID           | Q08752     | Peptidyl-prolyl cis-trans isomerase D                         | 35   |
| GSS            | P48637     | Glutathione synthetase                                        | 46   |
| HARS           | P12081     | Histidine--tRNA ligase, cytoplasmic                           | 319  |
| NASP           | P49321     | Nuclear autoantigenic sperm protein                           | 595  |
| EEF1A2         | Q05639     | Elongation factor 1-alpha 2                                   | 1613 |
| SMARCC1        | Q92922     | SWI/SNF complex subunit SMARCC1                               | 160  |
| PTBP2          | Q9UKA9     | Polypyrimidine tract-binding protein 2                        | 170  |
| PLOD3          | H7C2V1     | Procollagen-lysine,2-oxoglutarate 5-dioxygenase 3 (Fragment)  | 149  |
| YWHAH          | Q04917     | 14-3-3 protein eta                                            | 1397 |
| PGRMC2         | O15173     | Membrane-associated progesterone receptor component 2         | 351  |
| SND1           | Q7KZF4     | Staphylococcal nuclease domain-containing protein 1           | 886  |
| CRYZ           | C9JH92     | Quinone oxidoreductase (Fragment)                             | 51   |
| EXOSC2         | Q13868     | Exosome complex component RRP4                                | 94   |
| DLAT           | E9PEJ4     | Acetyltransferase component of pyruvate dehydrogenase complex | 25   |
| TJP1           | A0A087X0K9 | Tight junction protein ZO-1                                   | 99   |
| ALYREF         | Q86V81     | THO complex subunit 4                                         | 430  |
| RFC3           | P40938     | Replication factor C subunit 3                                | 144  |
| GPD2           | P43304     | Glycerol-3-phosphate dehydrogenase, mitochondrial             | 64   |
| SEPT7          | Q16181     | Septin-7                                                      | 258  |
| SH3GL1         | Q99961     | Endophilin-A2                                                 | 77   |
| EMC2           | Q15006     | ER membrane protein complex subunit 2                         | 96   |
| PSMD9          | F5H5V4     | 26S proteasome non-ATPase regulatory subunit 9 (Fragment)     | 31   |
| ACP1           | G5E9R5     | Acid phosphatase 1, soluble, isoform CRA_d                    | 114  |
| CTNND1         | C9JZR2     | Catenin delta-1                                               | 50   |
| FUBP1          | Q96AE4     | Far upstream element-binding protein 1                        | 599  |
| HNRNPUL2-BSCL2 | H3BQZ7     | HCG2044799                                                    | 91   |
| SRSF11         | Q5T760     | Serine/arginine-rich-splicing factor 11 (Fragment)            | 31   |
| GIPC1          | O14908     | PDZ domain-containing protein GIPC1                           | 89   |

|          |            |                                                                     |       |
|----------|------------|---------------------------------------------------------------------|-------|
| MARC1    | H7BYZ9     | Mitochondrial amidoxime-reducing component 1 (Fragment)             | 35    |
| RDH11    | Q8TC12     | Retinol dehydrogenase 11                                            | 153   |
| SBDS     | Q9Y3A5     | Ribosome maturation protein SBDS                                    | 78    |
| RSU1     | Q15404     | Ras suppressor protein 1                                            | 132   |
| TUBA4A   | P68366     | Tubulin alpha-4A chain                                              | 4869  |
| DNM2     | P50570     | Dynamain-2                                                          | 93    |
| PTMA     | B8ZZQ6     | Prothymosin alpha                                                   | 817   |
| XRCC5    | P13010     | X-ray repair cross-complementing protein 5                          | 1805  |
| GAPDH    | P04406     | Glyceraldehyde-3-phosphate dehydrogenase                            | 7488  |
| CALM2    | P0DP24     | Calmodulin-2                                                        | 681   |
| EPS15L1  | M0R165     | Epidermal growth factor receptor substrate 15-like 1                | 25    |
| PSMD4    | P55036     | 26S proteasome non-ATPase regulatory subunit 4                      | 53    |
| PVR      | A0A0A0MSA9 | Poliovirus receptor                                                 | 0     |
| GSTM3    | P21266     | Glutathione S-transferase Mu 3                                      | 494   |
| CD59     | E9PR17     | CD59 glycoprotein                                                   | 45    |
| CAPZB    | B1AK88     | Capping protein (Actin filament) muscle Z-line, beta, isoform CRA_d | 615   |
| CALR     | P27797     | Calreticulin                                                        | 2656  |
| ANP32A   | P39687     | Acidic leucine-rich nuclear phosphoprotein 32 family member A       | 318   |
| UBE4B    | O95155     | Ubiquitin conjugation factor E4 B                                   | 31    |
| PEBP1    | P30086     | Phosphatidylethanolamine-binding protein 1                          | 853   |
| XRCC6    | P12956     | X-ray repair cross-complementing protein 6                          | 3356  |
| HIST1H1C | P16403     | Histone H1.2                                                        | 500   |
| CHTOP    | X6R700     | Chromatin target of PRMT1 protein                                   | 121   |
| KLC1     | G3V3H3     | Kinesin light chain 1                                               | 23    |
| CTNNA1   | P35221     | Catenin alpha-1                                                     | 901   |
| SOD1     | P00441     | Superoxide dismutase [Cu-Zn]                                        | 356   |
| PDS5B    | Q9NTI5     | Sister chromatid cohesion protein PDS5 homolog B                    | 44    |
| HEBP1    | Q9NRV9     | Heme-binding protein 1                                              | 133   |
| STX10    | O60499     | Syntaxin-10                                                         | 47    |
| SF3B2    | Q13435     | Splicing factor 3B subunit 2                                        | 193   |
| ITPA     | Q9BY32     | Inosine triphosphate pyrophosphatase                                | 69    |
| EIF4H    | Q15056     | Eukaryotic translation initiation factor 4H                         | 338   |
| YWHAB    | P31946-2   | Isoform Short of 14-3-3 protein beta/alpha                          | 3750  |
| P3H3     | Q8IVL6     | Prolyl 3-hydroxylase 3                                              | 29    |
| ESYT1    | Q9BSJ8     | Extended synaptotagmin-1                                            | 162   |
| SMC3     | Q9UQE7     | Structural maintenance of chromosomes protein 3                     | 173   |
| THUMPD1  | Q9NXG2     | THUMP domain-containing protein 1                                   | 67    |
| TUBB     | Q5JP53     | Tubulin beta chain                                                  | 12006 |
| CIAPIN1  | H3BV90     | Fe-S cluster assembly protein DRE2                                  | 38    |
| SFN      | P31947     | 14-3-3 protein sigma                                                | 1487  |
| COG3     | Q96JB2     | Conserved oligomeric Golgi complex subunit 3                        | 40    |
| PDIA6    | Q15084     | Protein disulfide-isomerase A6                                      | 2130  |
| ATIC     | P31939     | Bifunctional purine biosynthesis protein PURH                       | 1211  |
| CDV3     | Q9UKY7     | Protein CDV3 homolog                                                | 0     |
| EIF5     | P55010     | Eukaryotic translation initiation factor 5                          | 253   |
| RAC3     | J3QLK0     | Ras-related C3 botulinum toxin substrate 3 (Fragment)               | 41    |

|          |            |                                                                             |      |
|----------|------------|-----------------------------------------------------------------------------|------|
| CUL4B    | Q13620-1   | Isoform 2 of Cullin-4B                                                      | 216  |
| KHDRBS1  | Q07666     | KH domain-containing, RNA-binding, signal transduction-associated protein 1 | 221  |
| HDGFL2   | A0A087WX58 | Hepatoma-derived growth factor-related protein 2 (Fragment)                 | 57   |
| SRSF2    | J3KP15     | Serine/arginine-rich-splicing factor 2 (Fragment)                           | 527  |
| HNRNPD   | Q14103     | Heterogeneous nuclear ribonucleoprotein D0                                  | 1073 |
| ALDH7A1  | P49419-2   | Isoform 2 of Alpha-amino adipic semialdehyde dehydrogenase                  | 116  |
| CHORDC1  | Q9UHD1     | Cysteine and histidine-rich domain-containing protein 1                     | 49   |
| TPM4     | P67936-2   | Isoform 2 of Tropomyosin alpha-4 chain                                      | 784  |
| SRPRA    | P08240     | Signal recognition particle receptor subunit alpha                          | 0    |
| RPL27    | P61353     | 60S ribosomal protein L27                                                   | 331  |
| MSN      | P26038     | Moesin                                                                      | 2856 |
| DHX9     | Q08211     | ATP-dependent RNA helicase A                                                | 488  |
| SNRPA    | P09012     | U1 small nuclear ribonucleoprotein A                                        | 195  |
| YTHDF3   | A0A087WY31 | YTH domain-containing family protein 3                                      | 48   |
| CBFB     | Q13951-2   | Isoform 2 of Core-binding factor subunit beta                               | 45   |
| RAB3GAP2 | Q9H2M9     | Rab3 GTPase-activating protein non-catalytic subunit                        | 19   |
| CAPZA1   | P52907     | F-actin-capping protein subunit alpha-1                                     | 804  |
| OXCT1    | P55809     | Succinyl-CoA:3-ketoacid coenzyme A transferase 1, mitochondrial             | 1313 |
| PPIF     | P30405     | Peptidyl-prolyl cis-trans isomerase F, mitochondrial                        | 36   |
| ATP6V1A  | P38606     | V-type proton ATPase catalytic subunit A                                    | 397  |
| TRMT10B  | Q6PF06     | tRNA methyltransferase 10 homolog B                                         | 23   |
| ALB      | P02768     | Serum albumin                                                               | 503  |
| MGME1    | Q5QPE8     | Mitochondrial genome maintenance exonuclease 1                              | 0    |
| P4HA1    | P13674     | Prolyl 4-hydroxylase subunit alpha-1                                        | 68   |
| GIGYF2   | C9JRZ2     | GRB10-interacting GYF protein 2 (Fragment)                                  | 77   |
| PLCB3    | Q01970     | 1-phosphatidylinositol 4,5-bisphosphate phosphodiesterase beta-3            | 79   |
| L1CAM    | P32004     | Neural cell adhesion molecule L1                                            | 151  |
| AHNAK    | Q09666     | Neuroblast differentiation-associated protein AHNAK                         | 1629 |
| ELAVL1   | Q15717     | ELAV-like protein 1                                                         | 180  |
| ST13     | P50502     | Hsc70-interacting protein                                                   | 495  |
| VAPA     | Q9P0L0     | Vesicle-associated membrane protein-associated protein A                    | 111  |
| MANF     | P55145     | Mesencephalic astrocyte-derived neurotrophic factor                         | 56   |
| HPF1     | Q9NWX4     | Histone PARylation factor 1                                                 | 21   |
| PAWR     | Q96IZ0     | PRKC apoptosis WT1 regulator protein                                        | 95   |
| KPNB1    | Q14974     | Importin subunit beta-1                                                     | 3299 |
| RANBP1   | P43487     | Ran-specific GTPase-activating protein                                      | 761  |
| PAICS    | P22234     | Multifunctional protein ADE2                                                | 1116 |
| LMNA     | P02545     | Prelamin-A/C                                                                | 9517 |
| SPTAN1   | Q13813     | Spectrin alpha chain, non-erythrocytic 1                                    | 410  |
| DDX39B   | Q13838     | Spliceosome RNA helicase DDX39B                                             | 593  |
| PSMD13   | Q9UNM6     | 26S proteasome non-ATPase regulatory subunit 13                             | 82   |
| SRRM1    | Q8IYB3     | Serine/arginine repetitive matrix protein 1                                 | 42   |
| -        | H0Y858     | Uncharacterized protein (Fragment)                                          | 36   |
| TOMM34   | Q15785     | Mitochondrial import receptor subunit TOM34                                 | 240  |
| ACBD3    | Q9H3P7     | Golgi resident protein GCP60                                                | 96   |

|         |            |                                                                         |      |
|---------|------------|-------------------------------------------------------------------------|------|
| LIMCH1  | H0Y8P3     | LIM and calponin homology domains-containing protein 1 (Fragment)       | 54   |
| SUCLG2  | Q96I99     | Succinate--CoA ligase [GDP-forming] subunit beta, mitochondrial         | 174  |
| GDI2    | P50395     | Rab GDP dissociation inhibitor beta                                     | 1799 |
| RRM2    | P31350     | Ribonucleoside-diphosphate reductase subunit M2                         | 23   |
| DMAP1   | Q9NPF5     | DNA methyltransferase 1-associated protein 1                            | 19   |
| PRKAR1A | P10644     | cAMP-dependent protein kinase type I-alpha regulatory subunit           | 102  |
| DDX1    | Q92499     | ATP-dependent RNA helicase DDX1                                         | 340  |
| ANXA4   | P09525     | Annexin A4                                                              | 172  |
| TPI1    | P60174-1   | Isoform 2 of Triosephosphate isomerase                                  | 3025 |
| PRKDC   | P78527     | DNA-dependent protein kinase catalytic subunit                          | 20   |
| LDHAL6B | Q9BYZ2     | L-lactate dehydrogenase A-like 6B                                       | 2079 |
| SDHB    | P21912     | Succinate dehydrogenase [ubiquinone] iron-sulfur subunit, mitochondrial | 45   |
| CYFIP1  | A0A0G2JQT1 | Cytoplasmic FMR1-interacting protein 1 (Fragment)                       | 53   |
| KPNA4   | O00629     | Importin subunit alpha-3                                                | 440  |
| PPP1CB  | C9J9S3     | Serine/threonine-protein phosphatase (Fragment)                         | 694  |
| RPL10   | F8W7C6     | 60S ribosomal protein L10                                               | 341  |
| NME1    | P15531     | Nucleoside diphosphate kinase A                                         | 1318 |
| ALDOA   | P04075     | Fructose-bisphosphate aldolase A                                        | 3180 |
| PGK1    | P00558     | Phosphoglycerate kinase 1                                               | 3740 |
| NIFK    | Q9BYG3     | MKI67 FHA domain-interacting nucleolar phosphoprotein                   | 121  |
| ACTR1A  | P61163     | Alpha-centractin                                                        | 52   |
| STAT1   | P42224     | Signal transducer and activator of transcription 1-alpha/beta           | 140  |
| FLOT1   | A0A140T907 | Flotillin-1 (Fragment)                                                  | 77   |
| COPB1   | P53618     | Coatomer subunit beta                                                   | 264  |
| LTA4H   | P09960     | Leukotriene A-4 hydrolase                                               | 155  |
| RPS15   | K7EQJ5     | 40S ribosomal protein S15                                               | 402  |
| ARPC3   | O15145     | Actin-related protein 2/3 complex subunit 3                             | 415  |
| NAXE    | Q8NCW5     | NAD(P)H-hydrate epimerase                                               | 66   |
| PRDX6   | P30041     | Peroxiredoxin-6                                                         | 1998 |
| ACLY    | P53396     | ATP-citrate synthase                                                    | 5240 |
| PCNA    | P12004     | Proliferating cell nuclear antigen                                      | 627  |
| ACTN1   | P12814     | Alpha-actinin-1                                                         | 7405 |
| YWHAZ   | P63104     | 14-3-3 protein zeta/delta                                               | 5807 |
| PCBP1   | Q15365     | Poly(rC)-binding protein 1                                              | 536  |
| LSS     | A0A0G2JQD0 | Lanosterol synthase (Fragment)                                          | 17   |
| ERO1A   | Q96HE7     | ERO1-like protein alpha                                                 | 180  |
| HNRNPA3 | P51991     | Heterogeneous nuclear ribonucleoprotein A3                              | 742  |
| YTHDF2  | Q9Y5A9     | YTH domain-containing family protein 2                                  | 90   |
| USP5    | P45974     | Ubiquitin carboxyl-terminal hydrolase 5                                 | 567  |
| ECH1    | Q13011     | Delta(3,5)-Delta(2,4)-dienoyl-CoA isomerase, mitochondrial              | 354  |
| IK      | Q13123     | Protein Red                                                             | 77   |
| CCAR2   | Q8N163     | Cell cycle and apoptosis regulator protein 2                            | 88   |
| CFL1    | P23528     | Cofilin-1                                                               | 4193 |
| NACA    | F8VZJ2     | Nascent polypeptide-associated complex subunit alpha                    | 2067 |
| SNAP23  | O00161     | Synaptosomal-associated protein 23                                      | 46   |



|         |        |                                                         |       |
|---------|--------|---------------------------------------------------------|-------|
| GBE1    | Q04446 | 1,4-alpha-glucan-branching enzyme                       | 84    |
| BZW2    | Q9Y6E2 | Basic leucine zipper and W2 domain-containing protein 2 | 270   |
| PRDX3   | P30048 | Thioredoxin-dependent peroxide reductase, mitochondrial | 365   |
| SF1     | Q15637 | Splicing factor 1                                       | 262   |
| HMGCS1  | Q01581 | Hydroxymethylglutaryl-CoA synthase, cytoplasmic         | 51    |
| FMR1    | A8MQB8 | Synaptic functional regulator FMR1                      | 25    |
| DCTN6   | E5RK00 | Dynactin subunit 6                                      | 27    |
| TBCA    | O75347 | Tubulin-specific chaperone A                            | 62    |
| TOP2A   | P11388 | DNA topoisomerase 2-alpha                               | 49    |
| LDHB    | P07195 | L-lactate dehydrogenase B chain                         | 4545  |
| YARS    | P54577 | Tyrosine--tRNA ligase, cytoplasmic                      | 608   |
| PFN1    | P07737 | Profilin-1                                              | 3600  |
| LGALS1  | P09382 | Galectin-1                                              | 228   |
| RACGAP1 | Q9H0H5 | Rac GTPase-activating protein 1                         | 24    |
| ANXA2   | P07355 | Annexin A2                                              | 10634 |
| MAGOHB  | Q96A72 | Protein mago nashi homolog 2                            | 115   |
| C8orf33 | Q9H7E9 | UPF0488 protein C8orf33                                 | 106   |
| FHL1    | Q5JXI8 | Four and a half LIM domains protein 1 (Fragment)        | 29    |
| MYO1E   | Q12965 | Unconventional myosin-Ie                                | 62    |
| SEC31A  | D6REX3 | Protein transport protein Sec31A                        | 20    |
| TMOD3   | Q9NYL9 | Tropomodulin-3                                          | 158   |
| HSDL2   | Q6YN16 | Hydroxysteroid dehydrogenase-like protein 2             | 81    |
| HADH    | Q16836 | Hydroxyacyl-coenzyme A dehydrogenase, mitochondrial     | 49    |
| RRM1    | P23921 | Ribonucleoside-diphosphate reductase large subunit      | 555   |
| MDH1    | P40925 | Malate dehydrogenase, cytoplasmic                       | 277   |
| DCUN1D1 | C9JVE2 | DCN1-like protein                                       | 33    |
| LDHA    | P00338 | L-lactate dehydrogenase A chain                         | 5079  |
| ATP1B3  | P54709 | Sodium/potassium-transporting ATPase subunit beta-3     | 20    |
| ACTR2   | P61160 | Actin-related protein 2                                 | 304   |
| MARCKS  | P29966 | Myristoylated alanine-rich C-kinase substrate           | 576   |
| RTF1    | Q92541 | RNA polymerase-associated protein RTF1 homolog          | 23    |
| DCTN2   | H0YI98 | Dynactin subunit 2 (Fragment)                           | 125   |
| EXOSC3  | Q9NQT5 | Exosome complex component RRP40                         | 30    |
| SLC3A2  | F5GZS6 | 4F2 cell-surface antigen heavy chain                    | 4509  |
| CANX    | D6RB85 | Calnexin (Fragment)                                     | 631   |
| MRRF    | Q96E11 | Ribosome-recycling factor, mitochondrial                | 41    |
| ALDH1A2 | H0YMG7 | Retinal dehydrogenase 2                                 | 64    |
| PARK7   | Q99497 | Protein/nucleic acid deglycase DJ-1                     | 387   |
| PLEKHJ1 | K7EIZ3 | Pleckstrin homology domain-containing family J member 1 | 0     |
| YWHAE   | P62258 | 14-3-3 protein epsilon                                  | 4736  |
| TLL12   | Q14166 | Tubulin--tyrosine ligase-like protein 12                | 85    |
| PHPT1   | Q9NRX4 | 14 kDa phosphohistidine phosphatase                     | 70    |
| HDAC1   | Q13547 | Histone deacetylase 1                                   | 49    |
| MCM7    | P33993 | DNA replication licensing factor MCM7                   | 859   |
| MRPS31  | Q92665 | 28S ribosomal protein S31, mitochondrial                | 0     |
| LYAR    | Q9NX58 | Cell growth-regulating nucleolar protein                | 25    |
| EHD1    | Q9H4M9 | EH domain-containing protein 1                          | 83    |
| TM4SF1  | F8WF27 | Transmembrane 4 L6 family member 1                      | 31    |

|          |            |                                                                                |      |
|----------|------------|--------------------------------------------------------------------------------|------|
| MMS19    | Q96T76     | MMS19 nucleotide excision repair protein homolog                               | 42   |
| AHCY     | P23526     | Adenosylhomocysteinase                                                         | 842  |
| NUDT21   | O43809     | Cleavage and polyadenylation specificity factor subunit 5                      | 44   |
| SGTA     | O43765     | Small glutamine-rich tetratricopeptide repeat-containing protein alpha         | 93   |
| GSTK1    | E9PFN5     | Glutathione S-transferase kappa                                                | 84   |
| CMBL     | Q96DG6     | Carboxymethylenebutenolidase homolog                                           | 56   |
| FSCN1    | Q16658     | Fascin                                                                         | 1448 |
| PAFAH1B3 | Q15102     | Platelet-activating factor acetylhydrolase IB subunit gamma                    | 165  |
| IDH1     | O75874     | Isocitrate dehydrogenase [NADP] cytoplasmic                                    | 547  |
| MAPRE1   | Q15691     | Microtubule-associated protein RP/EB family member 1                           | 177  |
| KRT85    | P78386     | Keratin, type II cuticular Hb5                                                 | 256  |
| UFC1     | Q9Y3C8     | Ubiquitin-fold modifier-conjugating enzyme 1                                   | 0    |
| PRRC2C   | A0A0A0MS30 | Protein PRRC2C                                                                 | 25   |
| DNAJC9   | Q8WXX5     | DnaJ homolog subfamily C member 9                                              | 51   |
| NUP98    | P52948     | Nuclear pore complex protein Nup98-Nup96                                       | 73   |
| RRAS2    | P62070     | Ras-related protein R-Ras2                                                     | 43   |
| PAFAH1B2 | P68402     | Platelet-activating factor acetylhydrolase IB subunit beta                     | 349  |
| TRMT61A  | Q96FX7     | tRNA (adenine(58)-N(1))-methyltransferase catalytic subunit TRMT61A            | 36   |
| RBBP5    | Q15291     | Retinoblastoma-binding protein 5                                               | 51   |
| TXNDC17  | I3L0K2     | Thioredoxin domain-containing protein 17                                       | 25   |
| RALYL    | Q86SE5     | RNA-binding Raly-like protein                                                  | 84   |
| SSB      | P05455     | Lupus La protein                                                               | 518  |
| KTN1     | Q86UP2     | Kinectin                                                                       | 355  |
| MAP1B    | P46821     | Microtubule-associated protein 1B                                              | 81   |
| DUT      | P33316     | Deoxyuridine 5'-triphosphate nucleotidohydrolase, mitochondrial                | 653  |
| TKT      | P29401     | Transketolase                                                                  | 5404 |
| CSRP1    | E9PP21     | Cysteine and glycine-rich protein 1                                            | 432  |
| NDUFB10  | H3BPJ9     | NADH dehydrogenase [ubiquinone] 1 beta subcomplex subunit 10                   | 27   |
| CAV1     | E9PCT5     | Caveolin                                                                       | 105  |
| PPP1R12A | O14974     | Protein phosphatase 1 regulatory subunit 12A                                   | 146  |
| PDHB     | P11177     | Pyruvate dehydrogenase E1 component subunit beta, mitochondrial                | 423  |
| ASNA1    | K7ERW9     | Arsenical pump-driving ATPase (Fragment)                                       | 29   |
| FDPS     | P14324     | Farnesyl pyrophosphate synthase                                                | 169  |
| CTPS1    | P17812     | CTP synthase 1                                                                 | 552  |
| MCAT     | Q8IVS2     | Malonyl-CoA-acyl carrier protein transacylase, mitochondrial                   | 21   |
| DRG2     | J3QKW7     | Developmentally-regulated GTP-binding protein 2                                | 27   |
| HP1BP3   | X6RGJ2     | Heterochromatin protein 1-binding protein 3 (Fragment)                         | 122  |
| DPM1     | H0Y368     | Dolichol-phosphate mannosyltransferase subunit 1 (Fragment)                    | 125  |
| GPI      | A0A0A0MTS2 | Glucose-6-phosphate isomerase (Fragment)                                       | 3954 |
| CDC42    | P60953     | Cell division control protein 42 homolog                                       | 641  |
| ARPC4    | P59998     | Actin-related protein 2/3 complex subunit 4                                    | 161  |
| QARS     | P47897     | Glutamine--tRNA ligase                                                         | 605  |
| PDHA1    | P08559     | Pyruvate dehydrogenase E1 component subunit alpha, somatic form, mitochondrial | 270  |

|          |            |                                                                    |       |
|----------|------------|--------------------------------------------------------------------|-------|
| VPS35    | Q96QK1     | Vacuolar protein sorting-associated protein 35                     | 490   |
| AKR7A2   | O43488     | Aflatoxin B1 aldehyde reductase member 2                           | 73    |
| OXSR1    | O95747     | Serine/threonine-protein kinase OSR1                               | 281   |
| TSNAX    | Q99598     | Translin-associated protein X                                      | 41    |
| TTC1     | Q99614     | Tetratricopeptide repeat protein 1                                 | 19    |
| ARPC2    | O15144     | Actin-related protein 2/3 complex subunit 2                        | 327   |
| FKBP8    | Q14318     | Peptidyl-prolyl cis-trans isomerase FKBP8                          | 113   |
| PDLIM5   | Q96HC4     | PDZ and LIM domain protein 5                                       | 241   |
| IGF2BP1  | Q9NZI8     | Insulin-like growth factor 2 mRNA-binding protein 1                | 178   |
| TMPO     | P42166     | Lamina-associated polypeptide 2, isoform alpha                     | 531   |
| WARS     | P23381     | Tryptophan--tRNA ligase, cytoplasmic                               | 442   |
| HPRT1    | P00492     | Hypoxanthine-guanine phosphoribosyltransferase                     | 558   |
| PNN      | Q9H307     | Pinin                                                              | 70    |
| SF3A3    | Q12874     | Splicing factor 3A subunit 3                                       | 174   |
| RBBP7    | C9JAJ9     | Histone-binding protein RBBP7 (Fragment)                           | 91    |
| HDGF     | P51858     | Hepatoma-derived growth factor                                     | 791   |
| PCMT1    | P22061     | Protein-L-isoaspartate(D-aspartate) O-methyltransferase            | 75    |
| ARL6IP5  | O75915     | PRA1 family protein 3                                              | 127   |
| TAGLN2   | P37802     | Transgelin-2                                                       | 4464  |
| ACTN4    | O43707     | Alpha-actinin-4                                                    | 12861 |
| RAB1B    | Q9H0U4     | Ras-related protein Rab-1B                                         | 301   |
| -        | P00761     | Trypsin OS=Sus scrofa                                              | 1506  |
| AIP      | E9PMH2     | Peptidylprolyl isomerase (Fragment)                                | 0     |
| GOLPH3   | Q9H4A6     | Golgi phosphoprotein 3                                             | 96    |
| GNA12    | Q03113     | Guanine nucleotide-binding protein subunit alpha-12                | 58    |
| AKR1A1   | P14550     | Alcohol dehydrogenase [NADP(+)]                                    | 92    |
| AHSA1    | H0YJG7     | Activator of 90 kDa heat shock protein ATPase homolog 1 (Fragment) | 181   |
| CMPK1    | P30085     | UMP-CMP kinase                                                     | 380   |
| CBX5     | P45973     | Chromobox protein homolog 5                                        | 153   |
| SNRNPB   | P14678     | Small nuclear ribonucleoprotein-associated proteins B and B'       | 495   |
| MYLK3    | Q32MK0     | Myosin light chain kinase 3                                        | 36    |
| UBE2E2   | F8W8F0     | Ubiquitin-conjugating enzyme E2 E2                                 | 0     |
| TUFT1    | Q6UWW7     | TUFT1                                                              | 37    |
| TBCB     | Q99426     | Tubulin-folding cofactor B                                         | 65    |
| GLO1     | Q04760     | Lactoylglutathione lyase                                           | 390   |
| AARS     | P49588     | Alanine--tRNA ligase, cytoplasmic                                  | 251   |
| KIAA1522 | Q9P206-2   | Isoform 2 of Uncharacterized protein KIAA1522                      | 19    |
| RPS21    | P63220     | 40S ribosomal protein S21                                          | 129   |
| MARCKSL1 | P49006     | MARCKS-related protein                                             | 114   |
| TYMS     | P04818     | Thymidylate synthase                                               | 279   |
| TUBAL3   | A6NHL2     | Tubulin alpha chain-like 3                                         | 649   |
| STAT5A   | K7EK35     | Signal transducer and activator of transcription                   | 15    |
| TPM4     | P67936     | Tropomyosin alpha-4 chain                                          | 1803  |
| TCEA1    | A0A1W2PPZ5 | Transcription elongation factor A protein 1                        | 298   |
| RAB18    | Q9NP72     | Ras-related protein Rab-18                                         | 31    |
| DCTN5    | Q9BTE1     | Dynactin subunit 5                                                 | 58    |
| ATP6V0D1 | F5GYQ1     | V-type proton ATPase subunit                                       | 95    |

|            |            |                                                                          |       |
|------------|------------|--------------------------------------------------------------------------|-------|
| APRT       | P07741     | Adenine phosphoribosyltransferase                                        | 190   |
| FKBP1A     | P62942     | Peptidyl-prolyl cis-trans isomerase FKBP1A                               | 235   |
| DBNL       | Q9UJU6-3   | Isoform 3 of Drebrin-like protein                                        | 357   |
| RFC1       | P35251     | Replication factor C subunit 1                                           | 15    |
| HPCAL1     | P37235     | Hippocalcin-like protein 1                                               | 83    |
| COPS5      | Q92905     | COP9 signalosome complex subunit 5                                       | 68    |
| EMD        | P50402     | Emerin                                                                   | 282   |
| ENO1       | P06733     | Alpha-enolase                                                            | 24596 |
| FLNA       | P21333     | Filamin-A                                                                | 5279  |
| SLC9A3R1   | O14745     | Na(+)/H(+) exchange regulatory cofactor NHE-RF1                          | 290   |
| LONP1      | K7EKE6     | Lon protease homolog, mitochondrial                                      | 134   |
| HSPE1-MOB4 | S4R3N1     | HSPE1-MOB4 readthrough                                                   | 213   |
| CAP1       | Q01518     | Adenylyl cyclase-associated protein 1                                    | 1900  |
| PPA1       | Q15181     | Inorganic pyrophosphatase                                                | 590   |
| SDHA       | P31040     | Succinate dehydrogenase [ubiquinone] flavoprotein subunit, mitochondrial | 386   |
| MYL6       | B7Z6Z4     | Myosin light polypeptide 6                                               | 844   |
| NNMT       | P40261     | Nicotinamide N-methyltransferase                                         | 69    |
| UBA2       | Q9UBT2     | SUMO-activating enzyme subunit 2                                         | 31    |
| CAPN1      | E9PL37     | Calpain-1 catalytic subunit (Fragment)                                   | 21    |
| UBQLN1     | Q9UMX0     | Ubiquilin-1                                                              | 102   |
| MYL12B     | O14950     | Myosin regulatory light chain 12B                                        | 1188  |
| TIGAR      | Q9NQ88     | Fructose-2,6-bisphosphatase TIGAR                                        | 174   |
| SUPT16H    | Q9Y5B9     | FACT complex subunit SPT16                                               | 124   |
| ANP32E     | Q9BTT0     | Acidic leucine-rich nuclear phosphoprotein 32 family member E            | 100   |
| UBE2I      | H3BPC4     | SUMO-conjugating enzyme UBC9 (Fragment)                                  | 14    |
| MCM4       | P33991     | DNA replication licensing factor MCM4                                    | 244   |
| YWHAG      | P61981     | 14-3-3 protein gamma                                                     | 2599  |
| ARL3       | P36405     | ADP-ribosylation factor-like protein 3                                   | 46    |
| PSMD8      | P48556     | 26S proteasome non-ATPase regulatory subunit 8                           | 35    |
| COPS4      | D6RAX7     | COP9 constitutive photomorphogenic-like protein subunit 4 isoform 2      | 64    |
| ME2        | A0A1W2PQF8 | Malic enzyme                                                             | 57    |
| FKBP10     | Q96AY3     | Peptidyl-prolyl cis-trans isomerase FKBP10                               | 70    |
| PPIA       | P62937     | Peptidyl-prolyl cis-trans isomerase A                                    | 5318  |
| RUFY1      | Q96T51     | RUN and FYVE domain-containing protein 1                                 | 58    |
| ACTB       | P60709     | Actin, cytoplasmic 1                                                     | 20263 |
| HYOU1      | Q9Y4L1     | Hypoxia up-regulated protein 1                                           | 237   |
| AP2A1      | O95782     | AP-2 complex subunit alpha-1                                             | 76    |
| PDXP       | Q96GD0     | Pyridoxal phosphate phosphatase                                          | 72    |
| FASN       | P49327     | Fatty acid synthase                                                      | 540   |
| PARVA      | J3KNQ4     | Alpha-parvin                                                             | 121   |
| ALDOC      | P09972     | Fructose-bisphosphate aldolase C                                         | 603   |
| NXN        | Q6DKJ4     | Nucleoredoxin                                                            | 46    |
| RANBP2     | P49792     | E3 SUMO-protein ligase RanBP2                                            | 60    |
| ENO3       | P13929     | Beta-enolase                                                             | 2620  |
| ARIH1      | H3BNB9     | E3 ubiquitin-protein ligase ARIH1 (Fragment)                             | 71    |
| NAPA       | P54920     | Alpha-soluble NSF attachment protein                                     | 72    |

|         |            |                                                                        |       |
|---------|------------|------------------------------------------------------------------------|-------|
| AFG3L2  | Q9Y4W6     | AFG3-like protein 2                                                    | 29    |
| DNAJB4  | Q9UDY4     | DnaJ homolog subfamily B member 4                                      | 140   |
| LEMD2   | Q8NC56     | LEM domain-containing protein 2                                        | 32    |
| WDR61   | Q9GZS3     | WD repeat-containing protein 61                                        | 29    |
| GNB4    | Q9HAV0     | Guanine nucleotide-binding protein subunit beta-4                      | 118   |
| ZYX     | H0Y2Y8     | Zyxin (Fragment)                                                       | 309   |
| MRPL37  | S4R369     | 39S ribosomal protein L37, mitochondrial                               | 59    |
| CUTA    | O60888     | Protein CutA                                                           | 54    |
| VAT1    | Q99536     | Synaptic vesicle membrane protein VAT-1 homolog                        | 156   |
| UBFD1   | O14562     | Ubiquitin domain-containing protein UBFD1                              | 52    |
| GNAI2   | P04899     | Guanine nucleotide-binding protein G(i) subunit alpha-2                | 126   |
| ACTN2   | P35609     | Alpha-actinin-2                                                        | 2011  |
| B4GALT1 | P15291     | Beta-1,4-galactosyltransferase 1                                       | 129   |
| UBLCP1  | Q8WVY7     | Ubiquitin-like domain-containing CTD phosphatase 1                     | 64    |
| PCYOX1  | Q9UHG3     | Prenylcysteine oxidase 1                                               | 64    |
| TUBB2A  | Q13885     | Tubulin beta-2A chain                                                  | 8465  |
| CLU     | H0YC35     | Clusterin (Fragment)                                                   | 50    |
| GNPNAT1 | G3V4W4     | Glucosamine 6-phosphate N-acetyltransferase (Fragment)                 | 60    |
| MYH9    | P35579     | Myosin-9                                                               | 11683 |
| AHCYL1  | O43865     | S-adenosylhomocysteine hydrolase-like protein 1                        | 33    |
| UBAP2L  | Q14157-1   | Isoform 2 of Ubiquitin-associated protein 2-like                       | 242   |
| GORASP2 | Q9H8Y8     | Golgi reassembly-stacking protein 2                                    | 20    |
| PPT1    | A0A286YFF7 | Palmitoyl-protein thioesterase 1                                       | 183   |
| VCL     | P18206     | Vinculin                                                               | 3747  |
| GTF2I   | P78347     | General transcription factor II-I                                      | 310   |
| SEPHS1  | P49903     | Selenide, water dikinase 1                                             | 43    |
| SAR1B   | Q9Y6B6     | GTP-binding protein SAR1b                                              | 33    |
| LANCL1  | O43813     | LanC-like protein 1                                                    | 41    |
| TES     | Q9UGI8     | Testin                                                                 | 175   |
| DHX36   | E7EWK3     | ATP-dependent RNA helicase DHX36 (Fragment)                            | 69    |
| TUBB6   | Q9BUF5     | Tubulin beta-6 chain                                                   | 3365  |
| STAT6   | Q5FBW6     | Signal transducer and activator of transcription 6                     | 0     |
| WDR1    | O75083     | WD repeat-containing protein 1                                         | 205   |
| MTHFD1  | P11586     | C-1-tetrahydrofolate synthase, cytoplasmic                             | 865   |
| DNM1    | A0A0D9SFB1 | Dynamin-1                                                              | 41    |
| SYAP1   | Q96A49     | Synapse-associated protein 1                                           | 62    |
| PTMS    | P20962     | Parathyrosin                                                           | 181   |
| DERA    | G3V158     | 2-deoxyribose-5-phosphate aldolase homolog (C. elegans), isoform CRA_a | 0     |
| DNAJC21 | Q5F1R6     | DnaJ homolog subfamily C member 21                                     | 61    |
| LASP1   | Q14847     | LIM and SH3 domain protein 1                                           | 506   |
| RPA1    | P27694     | Replication protein A 70 kDa DNA-binding subunit                       | 53    |
| GFAP    | K7EPT8     | Glial fibrillary acidic protein (Fragment)                             | 197   |
| NDUFA5  | Q16718     | NADH dehydrogenase [ubiquinone] 1 alpha subcomplex subunit 5           | 23    |
| RDX     | P35241     | Radixin                                                                | 1926  |
| THYN1   | Q9P016     | Thymocyte nuclear protein 1                                            | 28    |
| NR3C1   | P04150     | Glucocorticoid receptor                                                | 83    |
| UNC45A  | A0A1W2PNX8 | Protein unc-45 homolog A                                               | 41    |

|          |            |                                                                  |      |
|----------|------------|------------------------------------------------------------------|------|
| GOLGA2   | Q08379     | Golgin subfamily A member 2                                      | 103  |
| HAT1     | O14929     | Histone acetyltransferase type B catalytic subunit               | 263  |
| ALDH1B1  | P30837     | Aldehyde dehydrogenase X, mitochondrial                          | 240  |
| SRI      | P30626     | Sorcin                                                           | 48   |
| ACO2     | A2A274     | Aconitate hydratase, mitochondrial                               | 187  |
| PRMT1    | E9PKG1     | Protein arginine N-methyltransferase 1                           | 17   |
| OTULIN   | Q96BN8     | Ubiquitin thioesterase otulin                                    | 28   |
| ELAC2    | G5E9D5     | ElaC homolog 2 (E. coli), isoform CRA_a                          | 18   |
| RCC2     | Q9P258     | Protein RCC2                                                     | 78   |
| CFL2     | Q9Y281     | Cofilin-2                                                        | 1175 |
| G6PD     | P11413     | Glucose-6-phosphate 1-dehydrogenase                              | 1357 |
| IMPAD1   | Q9NX62     | Inositol monophosphatase 3                                       | 29   |
| GRHPR    | Q9UBQ7     | Glyoxylate reductase/hydroxypyruvate reductase                   | 143  |
| MCM5     | B1AHB1     | DNA helicase                                                     | 79   |
| ANXA3    | P12429     | Annexin A3                                                       | 756  |
| ECI1     | P42126     | Enoyl-CoA delta isomerase 1, mitochondrial                       | 207  |
| PDXK     | O00764     | Pyridoxal kinase                                                 | 207  |
| GMPPA    | Q96IJ6     | Mannose-1-phosphate guanyltransferase alpha                      | 32   |
| S100A4   | P26447     | Protein S100-A4                                                  | 343  |
| GOLIM4   | O00461     | Golgi integral membrane protein 4                                | 60   |
| UBA5     | E7EWE1     | Ubiquitin-like modifier-activating enzyme 5                      | 54   |
| DPYSL2   | Q16555     | Dihydropyrimidinase-related protein 2                            | 347  |
| CPT2     | P23786     | Carnitine O-palmitoyltransferase 2, mitochondrial                | 23   |
| CALD1    | E9PGZ1     | Caldesmon                                                        | 1241 |
| GCN1     | Q92616     | eIF-2-alpha kinase activator GCN1                                | 132  |
| RBBP7    | E9PC52     | Histone-binding protein RBBP7                                    | 409  |
| HNRNPUL1 | Q9BUJ2     | Heterogeneous nuclear ribonucleoprotein U-like protein 1         | 71   |
| PLS3     | P13797     | Plastin-3                                                        | 2618 |
| HIBADH   | P31937     | 3-hydroxyisobutyrate dehydrogenase, mitochondrial                | 221  |
| PC       | P11498     | Pyruvate carboxylase, mitochondrial                              | 44   |
| GFPT1    | Q06210     | Glutamine--fructose-6-phosphate aminotransferase [isomerizing] 1 | 87   |
| ACAT1    | P24752     | Acetyl-CoA acetyltransferase, mitochondrial                      | 233  |
| MRPL11   | H0YCD5     | 39S ribosomal protein L11, mitochondrial (Fragment)              | 29   |
| TLN1     | Q9Y490     | Talin-1                                                          | 1412 |
| PALLD    | Q8WX93     | Palladin                                                         | 141  |
| PFAS     | O15067     | Phosphoribosylformylglycinamide synthase                         | 196  |
| ATP6V1C1 | P21283     | V-type proton ATPase subunit C 1                                 | 153  |
| KRT10    | P13645     | Keratin, type I cytoskeletal 10                                  | 2112 |
| DCTPP1   | Q9H773     | dCTP pyrophosphatase 1                                           | 195  |
| MMAB     | S4R3Z1     | Cob(I)yrinic acid a,c-diamide adenosyltransferase, mitochondrial | 25   |
| PPIH     | H0YEL5     | Peptidyl-prolyl cis-trans isomerase (Fragment)                   | 13   |
| ERP44    | Q9BS26     | Endoplasmic reticulum resident protein 44                        | 36   |
| DDX47    | Q9H0S4     | Probable ATP-dependent RNA helicase DDX47                        | 63   |
| LRRC47   | Q8N1G4     | Leucine-rich repeat-containing protein 47                        | 165  |
| VDAC3    | Q9Y277     | Voltage-dependent anion-selective channel protein 3              | 431  |
| NELFE    | A0A0A0MSN9 | Negative elongation factor E (Fragment)                          | 66   |
| UGP2     | E7EUC7     | UTP--glucose-1-phosphate uridylyltransferase                     | 36   |

|          |          |                                                                                               |      |
|----------|----------|-----------------------------------------------------------------------------------------------|------|
| EIF3D    | O15371   | Eukaryotic translation initiation factor 3 subunit D                                          | 63   |
| TWF1     | Q12792   | Twinfilin-1                                                                                   | 53   |
| VPS29    | F8VXU5   | Vacuolar protein sorting-associated protein 29                                                | 40   |
| RPS6KA2  | F2Z2J1   | Ribosomal protein S6 kinase                                                                   | 0    |
| CCDC47   | Q96A33   | Coiled-coil domain-containing protein 47                                                      | 32   |
| RFC2     | P35250   | Replication factor C subunit 2                                                                | 84   |
| PPIC     | P45877   | Peptidyl-prolyl cis-trans isomerase C                                                         | 131  |
| PEPD     | P12955   | Xaa-Pro dipeptidase                                                                           | 43   |
| ECE1     | P42892   | Endothelin-converting enzyme 1                                                                | 43   |
| BASP1    | P80723   | Brain acid soluble protein 1                                                                  | 1453 |
| ATP6V1H  | Q9UI12   | V-type proton ATPase subunit H                                                                | 50   |
| CLIC4    | Q9Y696   | Chloride intracellular channel protein 4                                                      | 235  |
| ENAH     | Q8N8S7   | Protein enabled homolog                                                                       | 120  |
| CTDSPL2  | H0YMH7   | CTD small phosphatase-like protein 2 (Fragment)                                               | 52   |
| NCDN     | C9J5H8   | Neurochondrin (Fragment)                                                                      | 20   |
| FAM49B   | Q9NUQ9   | Protein FAM49B                                                                                | 261  |
| RPE      | C9J6A7   | Ribulose-phosphate 3-epimerase (Fragment)                                                     | 36   |
| -        | M0QZK8   | Uncharacterized protein                                                                       | 154  |
| DFFA     | O00273   | DNA fragmentation factor subunit alpha                                                        | 28   |
| TPD52    | P55327-3 | Isoform 3 of Tumor protein D52                                                                | 245  |
| CNN3     | Q15417   | Calponin-3                                                                                    | 85   |
| KIAA0368 | J3KN16   | KIAA0368                                                                                      | 113  |
| SLC39A7  | Q92504   | Zinc transporter SLC39A7                                                                      | 31   |
| HSPA4L   | O95757   | Heat shock 70 kDa protein 4L                                                                  | 332  |
| CSTF1    | Q05048   | Cleavage stimulation factor subunit 1                                                         | 21   |
| GNAI3    | P08754   | Guanine nucleotide-binding protein G(k) subunit alpha                                         | 74   |
| CNN2     | B4DDF4   | Calponin                                                                                      | 440  |
| ARPC5    | O15511   | Actin-related protein 2/3 complex subunit 5                                                   | 80   |
| SMARCD2  | Q92925   | SWI/SNF-related matrix-associated actin-dependent regulator of chromatin subfamily D member 2 | 16   |
| KRT17    | Q04695   | Keratin, type I cytoskeletal 17                                                               | 4926 |
| SEC23A   | F5H365   | Protein transport protein Sec23A                                                              | 86   |
| PPP1R10  | Q96QC0   | Serine/threonine-protein phosphatase 1 regulatory subunit 10                                  | 18   |
| NPEPPS   | E9PLK3   | Aminopeptidase                                                                                | 272  |
| ACAT2    | Q9BWD1   | Acetyl-CoA acetyltransferase, cytosolic                                                       | 225  |
| ATXN2L   | Q8WWM7   | Ataxin-2-like protein                                                                         | 20   |
| IPO9     | Q96P70   | Importin-9                                                                                    | 449  |
| EHD2     | Q9NZN4   | EH domain-containing protein 2                                                                | 85   |
| FAH      | P16930   | Fumarylacetoacetase                                                                           | 19   |
| TGFB1I1  | O43294   | Transforming growth factor beta-1-induced transcript 1 protein                                | 59   |
| STMN1    | P16949   | Stathmin                                                                                      | 76   |
| SPAG7    | O75391   | Sperm-associated antigen 7                                                                    | 54   |
| DBNL     | Q9UJU6   | Drebrin-like protein                                                                          | 419  |
| CBX1     | J3KS05   | Chromobox protein homolog 1 (Fragment)                                                        | 169  |
| GOT1     | P17174   | Aspartate aminotransferase, cytoplasmic                                                       | 253  |
| PGM1     | P36871   | Phosphoglucomutase-1                                                                          | 260  |
| ARHGAP17 | C9IZD3   | Rho GTPase-activating protein 17 (Fragment)                                                   | 40   |

|          |          |                                                                                             |      |
|----------|----------|---------------------------------------------------------------------------------------------|------|
| PPP2R5D  | H0Y8C4   | Serine/threonine-protein phosphatase 2A 56 kDa regulatory subunit delta isoform (Fragment)  | 35   |
| EZR      | P15311   | Ezrin                                                                                       | 2432 |
| SMCHD1   | J3KTL8   | Structural maintenance of chromosomes flexible hinge domain-containing protein 1 (Fragment) | 22   |
| PDE4D    | Q08499-6 | Isoform 5 of cAMP-specific 3',5'-cyclic phosphodiesterase 4D                                | 43   |
| CAPZA2   | P47755   | F-actin-capping protein subunit alpha-2                                                     | 96   |
| MRPL46   | Q9H2W6   | 39S ribosomal protein L46, mitochondrial                                                    | 35   |
| ATP5D    | P30049   | ATP synthase subunit delta, mitochondrial                                                   | 179  |
| MTRR     | Q9UBK8   | Methionine synthase reductase                                                               | 41   |
| NUP85    | Q9BW27   | Nuclear pore complex protein Nup85                                                          | 42   |
| DSTN     | F6RFD5   | Destrin                                                                                     | 174  |
| PDCD4    | Q53EL6   | Programmed cell death protein 4                                                             | 36   |
| SMARCA4  | P51532   | Transcription activator BRG1                                                                | 28   |
| CDKN2A   | Q8N726   | Tumor suppressor ARF                                                                        | 354  |
| TMPO     | H0YJH7   | Lamina-associated polypeptide 2, isoforms beta/gamma (Fragment)                             | 141  |
| EIF2A    | Q9BY44   | Eukaryotic translation initiation factor 2A                                                 | 64   |
| BAIAP2L1 | Q9UHR4   | Brain-specific angiogenesis inhibitor 1-associated protein 2-like protein 1                 | 0    |
| STOM     | P27105   | Erythrocyte band 7 integral membrane protein                                                | 271  |
| PREP     | P48147   | Prolyl endopeptidase                                                                        | 48   |
| CPS1     | P31327   | Carbamoyl-phosphate synthase [ammonia], mitochondrial                                       | 829  |
| KCTD12   | Q96CX2   | BTB/POZ domain-containing protein KCTD12                                                    | 301  |
| ANXA6    | P08133   | Annexin A6                                                                                  | 1019 |
| SLC16A7  | O60669   | Monocarboxylate transporter 2                                                               | 15   |
| FDFT1    | P37268   | Squalene synthase                                                                           | 47   |
| ARHGAP1  | Q07960   | Rho GTPase-activating protein 1                                                             | 158  |
| PRIM2    | P49643   | DNA primase large subunit                                                                   | 54   |
| HNRNPLL  | Q8WVV9   | Heterogeneous nuclear ribonucleoprotein L-like                                              | 18   |
| PLOD2    | E7ETU9   | Procollagen-lysine,2-oxoglutarate 5-dioxygenase 2                                           | 330  |
| BANF1    | O75531   | Barrier-to-autointegration factor                                                           | 20   |
| DHFR     | P00374   | Dihydrofolate reductase                                                                     | 122  |
| IDI1     | Q13907   | Isopentenyl-diphosphate Delta-isomerase 1                                                   | 49   |
| LIMA1    | F8VQE1   | LIM domain and actin-binding protein 1                                                      | 443  |
| EPPK1    | P58107   | Epiplakin                                                                                   | 992  |
| GSPT1    | P15170   | Eukaryotic peptide chain release factor GTP-binding subunit ERF3A                           | 35   |
| RBBP4    | Q09028   | Histone-binding protein RBBP4                                                               | 936  |
| H1FO     | P07305   | Histone H1.0                                                                                | 49   |
| NAA25    | Q14CX7   | N-alpha-acetyltransferase 25, NatB auxiliary subunit                                        | 18   |
| CAT      | P04040   | Catalase                                                                                    | 200  |
| ANXA8L1  | B4DTF2   | Annexin                                                                                     | 64   |
| ATXN10   | Q9UBB4   | Ataxin-10                                                                                   | 504  |
| GET4     | Q7L5D6   | Golgi to ER traffic protein 4 homolog                                                       | 14   |
| TPM1     | H7BYY1   | Tropomyosin 1 (Alpha), isoform CRA_m                                                        | 687  |
| HCCS     | P53701   | Cytochrome c-type heme lyase                                                                | 52   |
| DBN1     | Q16643   | Drebrin                                                                                     | 170  |
| SEC13    | P55735   | Protein SEC13 homolog                                                                       | 50   |



|          |            |                                                       |      |
|----------|------------|-------------------------------------------------------|------|
| GSN      | A0A0A0MT01 | Gelsolin                                              | 74   |
| ROCK2    | O75116     | Rho-associated protein kinase 2                       | 92   |
| CKB      | P12277     | Creatine kinase B-type                                | 2463 |
| PPM1A    | E9PKB5     | Protein phosphatase 1A (Fragment)                     | 17   |
| KRT18    | P05783     | Keratin, type I cytoskeletal 18                       | 2382 |
| PDLIM1   | O00151     | PDZ and LIM domain protein 1                          | 95   |
| DAZAP1   | Q96EP5     | DAZ-associated protein 1                              | 62   |
| GRWD1    | Q9BQ67     | Glutamate-rich WD repeat-containing protein 1         | 94   |
| HSPB1    | P04792     | Heat shock protein beta-1                             | 2607 |
| FSTL1    | H7C4W4     | Follistatin-related protein 1 (Fragment)              | 0    |
| CRIP2    | P52943     | Cysteine-rich protein 2                               | 75   |
| UBE2V2   | Q15819     | Ubiquitin-conjugating enzyme E2 variant 2             | 280  |
| ABLIM1   | J3QSX6     | Actin-binding LIM protein 1                           | 17   |
| DDB1     | Q16531     | DNA damage-binding protein 1                          | 37   |
| CSNK2A1  | E7EU96     | Casein kinase II subunit alpha                        | 22   |
| TAGLN    | Q01995     | Transgelin                                            | 1851 |
| SNX2     | O60749     | Sorting nexin-2                                       | 18   |
| ANXA6    | E5RK69     | Annexin                                               | 783  |
| TPM2     | P07951-2   | Isoform 2 of Tropomyosin beta chain                   | 1209 |
| RPA3     | P35244     | Replication protein A 14 kDa subunit                  | 21   |
| TUBB3    | Q13509     | Tubulin beta-3 chain                                  | 6433 |
| KRT80    | Q6KB66     | Keratin, type II cytoskeletal 80                      | 36   |
| CTSZ     | Q9UBR2     | Cathepsin Z                                           | 74   |
| PTRH2    | J3KQ48     | Peptidyl-tRNA hydrolase 2, mitochondrial              | 24   |
| UBE2L3   | P68036     | Ubiquitin-conjugating enzyme E2 L3                    | 53   |
| KRT8     | P05787     | Keratin, type II cytoskeletal 8                       | 6959 |
| TAF15    | Q92804     | TATA-binding protein-associated factor 2N             | 171  |
| MYL9     | P24844     | Myosin regulatory light polypeptide 9                 | 922  |
| AHCTF1   | Q8WYP5     | Protein ELYS                                          | 17   |
| MTCH1    | H0Y8C3     | Mitochondrial carrier homolog 1 (Fragment)            | 14   |
| P4HA2    | O15460     | Prolyl 4-hydroxylase subunit alpha-2                  | 59   |
| S100A13  | Q99584     | Protein S100-A13                                      | 40   |
| ITGA6    | P23229     | Integrin alpha-6                                      | 77   |
| CDKN2AIP | Q9NXV6     | CDKN2A-interacting protein                            | 0    |
| RNH1     | P13489     | Ribonuclease inhibitor                                | 231  |
| PYGB     | P11216     | Glycogen phosphorylase, brain form                    | 31   |
| MSH2     | P43246     | DNA mismatch repair protein Msh2                      | 106  |
| GLIPR2   | Q9H4G4     | Golgi-associated plant pathogenesis-related protein 1 | 42   |
| SAFB2    | Q14151     | Scaffold attachment factor B2                         | 22   |
| MAP7     | Q14244     | Ensconsin                                             | 65   |
| ATRX     | P46100     | Transcriptional regulator ATRX                        | 31   |
| DENR     | O43583     | Density-regulated protein                             | 0    |
| ARPC1B   | O15143     | Actin-related protein 2/3 complex subunit 1B          | 18   |
| TRAFD1   | O14545     | TRAF-type zinc finger domain-containing protein 1     | 86   |
| SETD7    | Q8WTS6     | Histone-lysine N-methyltransferase SETD7              | 20   |
| ACTC1    | P68032     | Actin, alpha cardiac muscle 1                         | 9779 |
| DPCD     | Q9BVM2     | Protein DPCD                                          | 59   |
| ADK      | P55263     | Adenosine kinase                                      | 27   |

|         |             |                                                                       |      |
|---------|-------------|-----------------------------------------------------------------------|------|
| KRT14   | P02533      | Keratin, type I cytoskeletal 14                                       | 1597 |
| KRT1    | P04264      | Keratin, type II cytoskeletal 1                                       | 4446 |
| CYC1    | P08574      | Cytochrome c1, heme protein, mitochondrial                            | 44   |
| ATP1B1  | P05026      | Sodium/potassium-transporting ATPase subunit beta-1                   | 22   |
| KRT19   | P08727      | Keratin, type I cytoskeletal 19                                       | 690  |
| KRT2    | P35908      | Keratin, type II cytoskeletal 2 epidermal                             | 1641 |
| ENG     | P17813      | Endoglin                                                              | 88   |
| APOA1   | P02647      | Apolipoprotein A-I                                                    | 170  |
| MIF     | P14174      | Macrophage migration inhibitory factor                                | 83   |
| APOE    | P02649      | Apolipoprotein E                                                      | 103  |
| KRT9    | P35527      | Keratin, type I cytoskeletal 9                                        | 1355 |
| PEG10   | A0A087W XK2 | Retrotransposon-derived protein PEG10                                 | 35   |
| CD99    | A0A096LP69  | CD99 antigen                                                          | 31   |
| SH3GLB1 | Q9Y371      | Endophilin-B1                                                         | 17   |
| TBC1D4  | O60343      | TBC1 domain family member 4                                           | 0    |
| EDIL3   | O43854      | EGF-like repeat and discoidin I-like domain-containing protein 3      | 20   |
| IVD     | P26440      | Isovaleryl-CoA dehydrogenase, mitochondrial                           | 24   |
| SET     | Q01105      | Protein SET                                                           | 1558 |
| CLPTM1  | K7EQQ1      | Cleft lip and palate transmembrane protein 1 (Fragment)               | 27   |
| AK4     | P27144      | Adenylate kinase 4, mitochondrial                                     | 17   |
| ZNF207  | H0Y3M2      | BUB3-interacting and GLEBS motif-containing protein ZNF207 (Fragment) | 40   |
| OPTN    | Q96CV9      | Optineurin                                                            | 0    |
| GUK1    | B1ANH2      | Guanylate kinase (Fragment)                                           | 20   |
| PANK4   | H0YA26      | Pantothenate kinase 4 (Fragment)                                      | 17   |
| PLAA    | E5RIM3      | Phospholipase A-2-activating protein                                  | 14   |
| MRPL43  | H0Y6Y8      | 39S ribosomal protein L43, mitochondrial (Fragment)                   | 23   |
| RAB5B   | P61020      | Ras-related protein Rab-5B                                            | 235  |
| PARVB   | Q9HBI1      | Beta-parvin                                                           | 20   |
| GYG1    | G5E9W8      | Glycogenin 1, isoform CRA_e                                           | 36   |
| RBM15   | A0A087W WP4 | Putative RNA-binding protein 15                                       | 25   |
| HTATIP2 | Q9BUP3-3    | Isoform 3 of Oxidoreductase HTATIP2                                   | 293  |
| PCID2   | Q5JVF3      | PCI domain-containing protein 2                                       | 23   |
| POLR1C  | O15160      | DNA-directed RNA polymerases I and III subunit RPAC1                  | 15   |
| PDCD10  | C9JND6      | Programmed cell death protein 10 (Fragment)                           | 53   |
| NUP88   | Q99567      | Nuclear pore complex protein Nup88                                    | 16   |
| SCARB2  | A0A1W2PS70  | Lysosome membrane protein 2                                           | 23   |
| DYNLRB2 | Q8TF09      | Dynein light chain roadblock-type 2                                   | 21   |
| PRPF8   | Q6P2Q9      | Pre-mRNA-processing-splicing factor 8                                 | 41   |
| LSM3    | P62310      | U6 snRNA-associated Sm-like protein LSM3                              | 37   |
| GNA11   | K7EL62      | Guanine nucleotide-binding protein subunit alpha-11 (Fragment)        | 14   |
| COPS8   | E9PGT6      | COP9 signalosome complex subunit 8                                    | 207  |
| AKAP8   | O43823      | A-kinase anchor protein 8                                             | 85   |
| PLK1    | I3L387      | Serine/threonine-protein kinase PLK1                                  | 14   |
| ARIH2   | O95376      | E3 ubiquitin-protein ligase ARIH2                                     | 16   |
| CHD1L   | A0A0A0MRH8  | Chromodomain-helicase-DNA-binding protein 1-like                      | 0    |
| HIKESHI | E9PJB2      | Protein Hikeshi                                                       | 83   |

|         |            |                                                       |     |
|---------|------------|-------------------------------------------------------|-----|
| OTUD6B  | A0A087X0W9 | OTU domain containing 6B, isoform CRA_b               | 43  |
| DVL2    | O14641     | Segment polarity protein dishevelled homolog DVL-2    | 77  |
| ZNF598  | H3BQQ2     | E3 ubiquitin-protein ligase ZNF598                    | 74  |
| KRT72   | Q14CN4     | Keratin, type II cytoskeletal 72                      | 398 |
| SIGMAR1 | Q5T1J1     | HCG20471, isoform CRA_c                               | 19  |
| KIF11   | P52732     | Kinesin-like protein KIF11                            | 14  |
| PXDN    | H7C1W1     | Peroxidasin homolog (Fragment)                        | 19  |
| ELOC    | Q15369     | Elongin-C                                             | 26  |
| UQCRES1 | P47985     | Cytochrome b-c1 complex subunit Rieske, mitochondrial | 44  |
